# Supplementary material for: Isolation and Evaluation of Streptomyces melanogenes YBS22 with Potential Application for Biocontrol of Rice Blast Disease
Source: Microorganisms. 2023 Dec 15;11(12):2988. doi: 10.3390/microorganisms11122988 (PMC10745888; doi:10.3390/microorganisms11122988)
Supplement: Supplementary file 1 [file microorganisms-11-02988-s001.zip]

Archive with 8 entries (8 files):
- Suppl-FigureS1_S9-2.pdf
- Supplementary_Table1.xlsx
- Supplementary_Table2.xlsx
- Supplementary_Table3.xlsx
- Supplementary_Table4.xlsx
- Supplementary_Table5.xlsx
- Supplementary_Table6.xlsx
- Supplementary_Table7.xlsx
