# Supplementary material for: Isolation and Evaluation of Streptomyces melanogenes YBS22 with Potential Application for Biocontrol of Rice Blast Disease
Source: Microorganisms. 2023 Dec 15;11(12):2988. doi: 10.3390/microorganisms11122988 (PMC10745888; doi:10.3390/microorganisms11122988)
Supplement: Supplementary file 1 [file microorganisms-11-02988-s001.zip › Supplementary_Table1.xlsx]

## Sheet: Sheet1
Name	Genome size(bp)	GC content in genome(%)	Base number
Chromosome	8754619	71.5932	A:1245978;T:1240930;G:3127376;C:3140335
PlasmidA	139106	71.3743	A:19953;T:19867;G:48803;C:50483
PlasmidB	70679	68.4843	A:11049;T:11226;G:24327;C:24077
PlasmidC	18074	67.3011	A:2553;T:3357;G:6202;C:5962
PlasmidD	3458	66.2811	A:582;T:584;G:1132;C:1160
