# Supplementary material for: Isolation and Evaluation of Streptomyces melanogenes YBS22 with Potential Application for Biocontrol of Rice Blast Disease
Source: Microorganisms. 2023 Dec 15;11(12):2988. doi: 10.3390/microorganisms11122988 (PMC10745888; doi:10.3390/microorganisms11122988)
Supplement: Supplementary file 1 [file microorganisms-11-02988-s001.zip › Supplementary_Table2.xlsx]

## Sheet: Sheet1
GO Term	GO Term	GO ID	Seq Number	Seq List
regulation of transcription, DNA-templated	Biological process	GO:0006355	194	gene2277;gene3277;gene3270;gene4798;gene4414;gene1395;gene3167;gene3278;gene0213;gene3071;gene0149;gene6700;gene1749;gene0893;gene1746;gene0218;gene0457;gene4205;gene3651;gene5373;gene0453;gene0696;gene4497;gene5544;gene5163;gene4011;gene5982;gene4853;gene2084;gene4415;gene6373;gene6371;gene0864;pA_gene0049;gene1389;gene4486;gene7116;gene1836;gene4401;pA_gene0113;gene0886;gene3206;gene2826;gene04…
carbohydrate metabolic process	Biological process	GO:0005975	105	gene7168;gene6847;gene1394;gene1390;gene5382;gene6925;gene3603;gene4677;gene1310;gene4010;gene0296;gene0297;pC_gene0018;gene3471;gene0758;gene7050;gene3369;gene0928;gene5632;gene1931;gene5635;gene5634;gene5435;gene0680;gene5937;gene1302;gene4482;gene3184;gene3183;gene2468;gene5259;gene4530;gene2743;gene0372;gene4730;gene1929;gene5325;gene6706;gene6705;gene5445;gene0677;gene6112;gene2265;gene0679;…
transmembrane transport	Biological process	GO:0055085	101	gene6840;gene7286;gene1392;gene1393;gene0890;gene0891;gene5273;gene5272;gene5271;gene7711;gene5307;gene5306;gene7629;gene5931;gene6968;gene7059;gene7709;gene2105;gene6832;gene6833;gene6834;gene6838;gene6839;gene6506;gene6507;gene6461;gene6460;gene2469;gene3584;gene6827;gene6826;gene6825;gene2507;gene4538;gene6708;gene6707;gene6459;gene5099;gene6817;gene1016;gene1015;gene4510;gene0780;gene0782;gen…
phosphorelay signal transduction system	Biological process	GO:0000160	100	gene3270;gene1397;gene6922;gene1746;gene0219;gene4205;gene0453;gene0696;gene4011;gene5982;gene1464;gene2084;gene7116;gene1836;gene4401;gene0886;gene3206;gene6504;gene6636;gene1306;gene1174;gene5533;gene0286;gene6064;gene6580;gene6102;gene2746;gene2744;gene7671;gene4536;gene7678;gene3104;gene6191;gene6054;gene1408;gene6592;gene4206;gene1641;gene3029;gene7139;gene6521;gene2517;gene1326;gene0034;gen…
methylation	Biological process	GO:0032259	74	gene2276;gene5642;gene7384;gene6801;gene4881;gene3214;gene3371;gene2407;gene2015;gene4735;gene6906;gene2110;gene3311;gene3994;gene1257;gene0479;gene4636;gene4109;gene0252;gene6230;gene7320;gene5303;gene5562;gene5442;gene7506;gene4908;gene2587;gene3988;gene6760;gene3411;gene4210;gene2366;gene1448;gene6116;gene6037;gene5399;gene5718;gene5679;gene5652;gene5717;gene7073;gene2732;gene1773;gene1859;gen…
translation	Biological process	GO:0006412	60	gene7250;gene7216;gene7753;gene7207;gene7756;gene6439;gene7754;gene2167;gene7223;gene6572;gene1121;gene7204;gene6237;gene7185;gene6437;gene7200;gene7201;gene7202;gene1085;gene7234;gene7210;gene7208;gene7209;gene1084;gene6350;gene7214;gene7224;gene6357;gene7233;gene7217;gene7218;gene7205;gene7206;gene7213;gene6309;gene2799;gene7184;gene6440;gene7237;gene2065;gene2064;gene7194;gene7190;gene4484;gen…
DNA-templated transcription, initiation	Biological process	GO:0006352	56	pA_gene0013;gene7070;gene0584;pB_gene0054;gene3427;gene7048;gene7049;gene0082;gene7166;gene4092;gene7656;gene7028;gene3006;gene7655;gene7770;gene7418;gene4715;gene2876;gene6720;gene5645;gene7390;gene2997;gene6130;gene6133;pA_gene0133;gene2992;gene0750;gene0491;gene3690;gene3433;gene3718;gene6697;gene2669;gene3004;gene6972;gene7138;gene5674;gene0197;gene4514;gene3062;gene2100;gene2388;gene7016;gen…
biosynthetic process	Biological process	GO:0009058	42	gene2255;gene2569;gene5661;gene7380;gene2789;gene0476;gene2291;gene5601;gene2834;gene2324;gene7588;gene4340;gene2567;gene4324;gene7079;gene5136;gene5780;gene0515;gene7242;gene6176;gene1356;gene4389;gene5861;gene6947;gene0098;gene2300;gene2122;gene2750;gene5671;gene2412;gene0158;gene6811;gene3114;gene5514;gene4217;gene7488;gene1497;gene1340;gene1766;gene1671;gene0484;gene2316
cell division	Biological process	GO:0051301	35	gene7245;gene2130;gene4516;gene0028;gene2741;gene5173;gene1062;gene6352;gene0535;gene1542;gene0755;gene0732;gene6331;gene0739;gene2206;gene6613;gene1873;gene1696;gene0738;gene1077;gene7735;gene7463;gene0787;gene5554;gene2590;gene5957;gene7153;gene6004;gene1530;gene1531;gene1532;gene1533;gene1534;gene1535;gene5954
DNA repair	Biological process	GO:0006281	31	gene7107;gene4698;gene7414;gene1922;gene2151;gene2150;gene1861;gene0004;gene6760;gene5561;gene6171;gene1505;gene2206;gene7295;gene6355;gene0193;gene2308;gene2149;gene5752;gene7258;gene1116;gene6444;gene6753;gene6202;gene1155;gene5392;gene5551;gene1650;gene5895;gene6759;gene0668
peptidoglycan biosynthetic process	Biological process	GO:0009252	30	gene7046;gene2448;gene2173;gene5746;gene5250;gene6988;gene6478;gene1463;gene7245;gene5292;gene0755;gene2344;gene3980;gene6362;gene2432;gene2433;gene0442;gene7178;gene1076;gene3917;gene4769;gene0568;gene6004;gene1530;gene1531;gene1532;gene1533;gene1534;gene1535;gene5954
regulation of cell shape	Biological process	GO:0008360	23	gene1069;gene7245;gene5292;gene0755;gene2344;gene3980;gene0442;gene1695;gene2432;gene2433;gene1073;gene1075;gene1532;gene1077;gene3917;gene0568;gene6004;gene1530;gene1531;gene6362;gene1533;gene1535;gene5954
DNA recombination	Biological process	GO:0006310	23	gene5215;gene0992;gene2151;gene2150;gene1861;gene6602;gene5561;gene6355;gene0980;gene2206;gene7295;gene6159;gene5846;gene4894;gene0193;gene5848;gene2149;gene4151;gene4131;gene6202;gene1155;gene0464;gene2376
cell wall organization	Biological process	GO:0071555	21	gene2287;gene7245;gene3980;gene6362;gene5292;gene3917;gene2432;gene2173;gene1535;gene0568;gene0755;gene2433;gene2448;gene6004;gene2344;gene1530;gene1531;gene1532;gene1533;gene0442;gene5954
DNA binding	Molecular function	GO:0003677	554	gene4798;gene3167;gene3161;gene5701;gene1105;gene0459;gene0893;gene3761;gene0457;gene0453;gene4497;gene4854;gene4857;gene6171;gene6170;gene4853;gene6071;gene6373;gene0860;gene6371;gene0864;gene0098;gene4975;gene2829;gene3111;gene5371;gene3115;gene4645;pD_gene0001;gene1176;gene1179;gene6109;gene6102;gene6105;gene5179;gene7107;gene2462;gene2746;gene2744;gene2742;gene6518;gene7770;gene0007;gene0006;…
ATP binding	Molecular function	GO:0005524	404	gene1100;gene3760;gene0452;gene5270;gene6170;gene6172;gene6077;gene6593;gene0865;gene4970;gene1775;gene1073;gene1072;gene1171;gene7511;gene6737;gene6105;gene3601;gene7107;gene2465;gene2464;gene7101;gene2743;gene6512;gene6511;gene1928;gene0007;gene6457;gene0004;gene0001;gene0775;gene2893;gene6458;gene5098;gene2263;gene2265;gene2264;gene2687;gene3340;gene6954;gene2041;gene2044;gene6810;gene7034;gen…
metal ion binding	Molecular function	GO:0046872	270	gene1879;gene4673;gene3592;gene2401;gene2671;gene4410;gene3372;gene3929;gene0213;gene7417;gene1942;gene2177;gene1254;gene6572;gene6755;gene6728;gene4163;gene6179;gene0355;gene2486;gene0514;gene0290;gene1461;gene0297;gene0513;gene0940;gene6077;gene0753;gene4286;gene6670;gene1894;gene2361;gene6846;gene5123;gene5704;gene5962;gene7053;gene5735;gene1835;gene5703;gene7294;gene7293;gene2861;gene6638;gen…
hydrolase activity	Molecular function	GO:0016787	241	gene5828;gene2560;gene4529;gene1394;gene2569;gene1390;gene6847;gene3072;gene0210;gene3881;gene3887;gene7413;gene2905;gene4201;gene2072;gene1256;gene6574;gene5424;gene7715;gene4491;gene6721;gene7496;gene5987;gene0869;gene6379;gene0752;gene2364;gene5861;gene1666;gene1667;gene6781;gene2478;gene0097;gene4403;gene7662;gene7557;gene4524;gene3205;gene5635;gene4722;gene0446;gene5165;gene2824;gene6111;gen…
oxidoreductase activity	Molecular function	GO:0016491	206	gene2276;gene6845;gene2274;gene2275;gene4797;gene4962;gene2677;gene1942;gene5625;gene1948;gene0456;gene3391;gene0450;gene5208;gene7164;gene0351;gene2482;gene4490;gene5276;gene4657;gene7284;gene1509;gene2361;gene0759;gene5470;gene1834;gene5977;gene3201;gene5636;gene0448;gene3756;gene2779;gene2109;gene3116;gene3117;gene5366;gene0761;gene0281;gene1226;gene2679;gene5878;pA_gene0059;gene0608;gene0812;…
DNA-binding transcription factor activity	Molecular function	GO:0003700	193	gene2673;gene4963;gene4793;gene6682;gene1824;gene0896;gene5076;gene5624;gene3884;gene5627;gene5177;gene2481;gene4715;gene3809;gene4165;gene5780;gene0069;gene1187;gene7365;gene4916;gene6079;gene7358;gene7056;gene0098;gene3367;gene7296;gene3897;gene7661;gene2100;gene4791;gene3610;gene6504;gene4723;gene5436;gene1939;gene2821;gene4725;gene1229;gene5005;gene4092;gene6731;gene1225;gene5994;gene5380;gen…
transmembrane transporter activity	Molecular function	GO:0022857	153	gene2272;gene4552;gene4416;gene4965;gene1825;gene5077;gene1106;gene5179;gene0454;gene5629;gene6726;gene4697;gene4494;gene2045;gene1188;gene6601;gene4498;gene5305;gene4724;gene5665;gene1897;gene5866;gene0867;gene0866;gene5965;gene1385;gene0091;gene5003;gene7667;gene3750;gene1645;gene1178;gene4004;gene6100;gene5747;gene5877;gene6341;gene5724;gene4948;gene3626;gene0472;gene2292;gene7027;gene2051;gen…
catalytic activity	Molecular function	GO:0003824	100	gene4554;gene4557;gene4553;gene2760;gene1254;gene2075;gene6476;gene5780;gene6075;gene0945;pA_gene0020;gene2367;gene6803;gene0921;gene0098;gene5962;gene1079;gene3047;gene5435;gene3757;gene1778;gene0361;gene3443;gene3685;gene1340;gene2695;gene6786;gene2501;gene0371;gene5526;gene7079;gene7349;gene0125;gene2343;gene6591;gene5887;gene6117;gene2324;gene2756;gene2807;gene7522;gene7038;gene0067;gene5696;…
integral component of membrane	Cellular component	GO:0016021	1140	gene5708;gene0597;gene0897;gene0591;gene0891;gene7405;gene5045;gene0454;gene7020;gene7188;gene1109;gene0598;gene7563;gene7562;gene4494;gene0352;gene4997;gene4991;gene4990;gene6601;gene6596;gene3803;gene7315;gene4498;gene4998;gene6609;gene0295;gene7063;gene6070;gene4286;gene3451;gene0862;gene2568;gene5122;gene0094;gene2405;gene0096;gene4970;gene0091;gene4974;gene1772;gene0681;gene7622;gene4720;gen…
plasma membrane	Cellular component	GO:0005886	268	gene7668;gene7709;gene5707;gene7286;gene2405;gene1392;gene1393;gene2935;gene2934;gene7463;gene0890;gene0891;gene2933;gene7313;gene6726;gene1109;gene6506;gene5262;gene4018;gene5272;gene5271;gene6507;gene0730;gene1462;gene4726;gene1461;gene1466;gene5306;gene0698;gene1465;gene5930;gene4510;gene1894;gene7148;gene7760;gene0611;gene7118;gene7117;gene7240;gene2104;gene2105;gene6832;gene6833;gene6838;gen…
cytoplasm	Cellular component	GO:0005737	262	gene2409;gene2087;gene6841;gene6579;gene5978;gene2171;gene0895;gene0148;gene2172;gene3600;gene6700;gene2177;gene1102;gene5420;gene3760;gene6575;gene0147;gene6874;gene6631;gene1062;gene1063;gene5980;gene6724;gene6353;gene1069;gene0755;gene2086;gene7777;gene1507;gene7107;gene2028;gene2089;gene2088;gene3190;gene7195;gene1835;gene3365;gene2477;gene1833;gene6264;gene2069;gene2068;gene6260;gene0155;gen…
ribosome	Cellular component	GO:0005840	48	pA_gene0035;gene7250;gene7753;gene7756;gene7754;gene6572;gene1121;gene7204;gene6237;gene7185;gene7184;gene7200;gene7201;gene7202;gene6217;gene7210;gene7208;gene7209;gene1084;gene1085;gene7233;gene6357;gene7217;gene7218;gene7205;gene1656;gene7206;gene7745;gene7207;gene2799;gene7238;gene2065;gene2064;gene7194;gene7216;gene7190;gene7211;gene7192;gene7193;gene7203;gene7219;gene7212;gene7781;gene6325;…
ATP-binding cassette (ABC) transporter complex	Cellular component	GO:0043190	41	gene5585;gene2018;gene5586;gene6840;gene2335;gene6968;gene2017;gene7543;gene5747;gene6826;gene5748;gene7449;gene5273;gene0779;gene0416;gene2580;gene1168;gene1319;gene5305;gene0537;gene7629;gene1620;gene0867;gene0714;gene6834;gene0841;gene6773;gene7059;gene6817;gene4256;gene4257;gene1365;gene5516;gene3655;gene6460;gene1714;gene6672;gene4761;gene2045;gene0866;gene6285
extracellular region	Cellular component	GO:0005576	31	gene0871;gene4575;gene4410;gene5152;gene5381;gene6393;gene4471;gene3666;gene2916;gene5363;gene5543;gene0290;gene0657;gene2223;gene6013;gene2759;gene3575;gene5109;gene3119;gene4502;gene5168;gene5167;gene5790;gene7334;gene1765;gene1152;gene4482;gene2883;gene6482;gene0604;gene3877
membrane	Cellular component	GO:0016020	20	gene0781;gene4311;gene2451;gene4482;gene3545;gene7054;gene2581;gene6793;gene2666;gene5288;gene0504;gene2106;gene7309;gene2044;gene5918;gene1879;gene1841;gene1689;gene7066;gene0441
integral component of plasma membrane	Cellular component	GO:0005887	16	gene7545;gene5120;gene5684;gene1168;gene2142;gene2448;gene6797;gene0537;gene2040;gene2173;gene7508;gene6593;gene7282;gene1583;gene2039;gene1536
large ribosomal subunit	Cellular component	GO:0015934	8	gene4484;gene7213;gene7208;gene7199;gene6350;gene7234;gene7200;gene7237
cell septum	Cellular component	GO:0030428	8	gene7735;gene0787;gene5554;gene2590;gene2130;gene0535;gene2741;gene5173
small ribosomal subunit	Cellular component	GO:0015935	7	gene6309;gene7201;gene7219;gene7214;gene7223;gene2167;gene7224
