# Supplementary material for: Isolation and Evaluation of Streptomyces melanogenes YBS22 with Potential Application for Biocontrol of Rice Blast Disease
Source: Microorganisms. 2023 Dec 15;11(12):2988. doi: 10.3390/microorganisms11122988 (PMC10745888; doi:10.3390/microorganisms11122988)
Supplement: Supplementary file 1 [file microorganisms-11-02988-s001.zip › Supplementary_Table3.xlsx]

## Sheet: Sheet1
Level1	Level2	Level3	Gene number	Gene list	Pathway list	KO list
Metabolism	Biosynthesis of other secondary metabolites	Phenazine biosynthesis	8	gene0475;gene0476;gene0483;gene0484;gene1497;gene1574;gene3213;gene4389	ko00405;ko00405;ko00405;ko00405;ko00405;ko00405;ko00405;ko00405	K20260;K06998;K20261;K13063;K13063;K01657;K20262;K06998
Cellular Processes	Cell motility	Bacterial chemotaxis	6	gene2006;gene3595;gene5161;gene7596;gene7597;gene7598	ko02030;ko02030;ko02030;ko02030;ko02030;ko02030	K10439;K10439;K10439;K13924;K03412;K13924
Cellular Processes	Cell growth and death	Cell cycle - Caulobacter	14	gene0001;gene1063;gene1064;gene1065;gene1261;gene1534;gene1535;gene1536;gene1537;gene2418;gene4890;gene6520;gene6631;gene7751	ko04112;ko04112;ko04112;ko04112;ko04112;ko04112;ko04112;ko04112;ko04112;ko04112;ko04112;ko04112;ko04112;ko04112	K02313;K01358;K01358;K03544;K02314;K03588;K02563;K03589;K03531;K01358;K02563;K02563;K01338;K02314
Metabolism	Global and overview maps	Degradation of aromatic compounds	21	gene1205;gene1329;gene1381;gene1510;gene1719;gene1948;gene2903;gene2923;gene3267;gene4228;gene4289;gene4920;gene4931;gene5369;gene5608;gene5609;gene5754;gene5812;gene5867;gene6196;gene7340	ko01220;ko01220;ko01220;ko01220;ko01220;ko01220;ko01220;ko01220;ko01220;ko01220;ko01220;ko01220;ko01220;ko01220;ko01220;ko01220;ko01220;ko01220;ko01220;ko01220;ko01220	K00529;K00121;K01826;K00529;K05710;K00121;K01857;K01055;K01053;K05712;K13953;K01607;K00481;K00141;K00448;K00449;K14727;K01821;K03464;K05712;K03186
Cellular Processes	Cellular community - prokaryotes	Biofilm formation - Pseudomonas aeruginosa	7	gene1436;gene1574;gene6312;gene6994;gene7225;gene7362;gene7532	ko02025;ko02025;ko02025;ko02025;ko02025;ko02025;ko02025	K21011;K01657;K02405;K01768;K10914;K03651;K10914
Metabolism	Xenobiotics biodegradation and metabolism	Chloroalkane and chloroalkene degradation	11	gene1300;gene1329;gene1946;gene1947;gene1948;gene3640;gene4289;gene5117;gene5614;gene7012;gene7474	ko00625;ko00625;ko00625;ko00625;ko00625;ko00625;ko00625;ko00625;ko00625;ko00625;ko00625	K00128;K00121;K00128;K00128;K00121;K00128;K13953;K00128;K01561;K00128;K00128
Metabolism	Carbohydrate metabolism	Pentose and glucuronate interconversions	10	gene0515;gene0655;gene1210;gene1782;gene2202;gene3588;gene3600;gene3601;gene4748;gene4756	ko00040;ko00040;ko00040;ko00040;ko00040;ko00040;ko00040;ko00040;ko00040;ko00040	K00963;K00012;K00854;K01628;K01783;K00065;K01805;K00854;K03077;K22187
Genetic Information Processing	Translation	Ribosome	59	gene0566;gene1084;gene1085;gene1121;gene1656;gene2064;gene2065;gene2167;gene2797;gene2798;gene2799;gene2800;gene2802;gene4484;gene6237;gene6309;gene6323;gene6327;gene6350;gene6357;gene6572;gene7184;gene7185;gene7190;gene7192;gene7193;gene7194;gene7199;gene7200;gene7201;gene7202;gene7203;gene7204;gene7205;gene7206;gene7207;gene7208;gene7209;gene7210;gene7211;gene7212;gene7213;gene7214;gene7215;gen…	ko03010;ko03010;ko03010;ko03010;ko03010;ko03010;ko03010;ko03010;ko03010;ko03010;ko03010;ko03010;ko03010;ko03010;ko03010;ko03010;ko03010;ko03010;ko03010;ko03010;ko03010;ko03010;ko03010;ko03010;ko03010;ko03010;ko03010;ko03010;ko03010;ko03010;ko03010;ko03010;ko03010;ko03010;ko03010;ko03010;ko03010;ko03010;ko03010;ko03010;ko03010;ko03010;ko03010;ko03010;ko03010;ko03010;ko03010;ko03010;ko03010;ko03010…	K02897;K02888;K02899;K02968;K02945;K02916;K02887;K02986;K02954;K02902;K02913;K02909;K02963;K02911;K02956;K02967;K02884;K02959;K02911;K02902;K02909;K02996;K02871;K02879;K02948;K02952;K02919;K02876;K02907;K02988;K02881;K02933;K02994;K02954;K02931;K02895;K02874;K02961;K02904;K02878;K02982;K02890;K02965;K02886;K02892;K02926;K02906;K02946;K02992;K02950;K02935;K02864;K02863;K02867;K02913;K02939;K02963;…
Organismal Systems	Immune system	Antigen processing and presentation	1	gene5129	ko04612	K04079
Metabolism	Glycan biosynthesis and metabolism	N-Glycan biosynthesis	1	gene2249	ko00510	K00721
Metabolism	Lipid metabolism	Biosynthesis of unsaturated fatty acids	9	gene0563;gene0917;gene2438;gene3188;gene3230;gene4211;gene4212;gene5340;gene5556	ko01040;ko01040;ko01040;ko01040;ko01040;ko01040;ko01040;ko01040;ko01040	K00507;K10805;K10805;K10805;K00507;K22769;K22770;K10806;K03921
Genetic Information Processing	Replication and repair	Nucleotide excision repair	14	gene0321;gene0586;gene1650;gene1679;gene1687;gene1693;gene2206;gene5223;gene5392;gene6444;gene6753;gene6757;gene7107;gene7483	ko03420;ko03420;ko03420;ko03420;ko03420;ko03420;ko03420;ko03420;ko03420;ko03420;ko03420;ko03420;ko03420;ko03420	K10843;K03723;K02335;K03702;K03701;K03703;K10747;K03657;K03701;K01972;K03657;K03657;K03657;K02335
Metabolism	Metabolism of terpenoids and polyketides	Polyketide sugar unit biosynthesis	12	gene0720;gene0721;gene0722;gene0723;gene4468;gene4886;gene5647;pA_gene0016;pA_gene0017;pA_gene0019;pA_gene0021;pA_gene0022	ko00523;ko00523;ko00523;ko00523;ko00523;ko00523;ko00523;ko00523;ko00523;ko00523;ko00523;ko00523	K01790;K00067;K01710;K00973;K01790;K01710;K17947;K00973;K16435;K01710;K13328;K13327
Metabolism	Carbohydrate metabolism	C5-Branched dibasic acid metabolism	12	gene0921;gene1937;gene3472;gene3848;gene4343;gene6369;gene6370;gene6406;gene6424;gene6425;gene7097;gene7098	ko00660;ko00660;ko00660;ko00660;ko00660;ko00660;ko00660;ko00660;ko00660;ko00660;ko00660;ko00660	K01652;K18289;K01652;K10218;K01652;K01704;K01703;K00052;K01653;K01652;K01902;K01903
Metabolism	Metabolism of cofactors and vitamins	Biotin metabolism	28	gene1234;gene1605;gene1739;gene1797;gene1821;gene2333;gene2409;gene2410;gene2411;gene2412;gene2614;gene2779;gene3030;gene3187;gene3335;gene3391;gene3629;gene3631;gene3633;gene4340;gene4342;gene4833;gene4939;gene4944;gene5478;gene6211;gene6995;pA_gene0007	ko00780;ko00780;ko00780;ko00780;ko00780;ko00780;ko00780;ko00780;ko00780;ko00780;ko00780;ko00780;ko00780;ko00780;ko00780;ko00780;ko00780;ko00780;ko00780;ko00780;ko00780;ko00780;ko00780;ko00780;ko00780;ko00780;ko00780;ko00780	K09458;K00059;K09458;K00059;K00059;K00059;K01935;K00833;K01012;K00652;K09458;K00059;K00059;K00059;K00059;K00059;K09458;K02372;K00059;K00652;K09458;K00059;K09458;K00059;K00059;K00059;K03524;K00059
Genetic Information Processing	Translation	Aminoacyl-tRNA biosynthesis	34	gene0081;gene0086;gene0102;gene0265;gene0869;gene1067;gene1113;gene1171;gene1443;gene1543;gene1818;gene2068;gene2069;gene2138;gene2163;gene2171;gene2199;gene3190;gene3760;gene3869;gene4217;gene5407;gene6136;gene6268;gene6380;gene6437;gene6439;gene6440;gene6579;gene7069;gene7375;gene7376;gene7454;gene7706	ko00970;ko00970;ko00970;ko00970;ko00970;ko00970;ko00970;ko00970;ko00970;ko00970;ko00970;ko00970;ko00970;ko00970;ko00970;ko00970;ko00970;ko00970;ko00970;ko00970;ko00970;ko00970;ko00970;ko00970;ko00970;ko00970;ko00970;ko00970;ko00970;ko00970;ko00970;ko00970;ko00970;ko00970	K01876;K01874;K01867;K01883;K02433;K01873;K01869;K01880;K04567;K01870;K01866;K01889;K01890;K01868;K01892;K01872;K00604;K01885;K22503;K01042;K00604;K04567;K02433;K01881;K01885;K02434;K02433;K02435;K01887;K01867;K04566;K01887;K04567;K01875
Human Diseases	Infectious disease: bacterial	Salmonella infection	10	gene1698;gene3828;gene4214;gene4605;gene5129;gene5248;gene5367;gene6494;gene7773;pA_gene0044	ko05132;ko05132;ko05132;ko05132;ko05132;ko05132;ko05132;ko05132;ko05132;ko05132	K00134;K03671;K03671;K00134;K04079;K00134;K03671;K03671;K03671;K00134
Metabolism	Biosynthesis of other secondary metabolites	Phenylpropanoid biosynthesis	8	gene0889;gene1257;gene2352;gene2650;gene4411;gene5247;gene5944;gene7340	ko00940;ko00940;ko00940;ko00940;ko00940;ko00940;ko00940;ko00940	K05350;K00588;K05349;K05350;K05349;K03782;K05350;K03186
Human Diseases	Endocrine and metabolic disease	Type I diabetes mellitus	2	gene0307;gene7472	ko04940;ko04940	K04077;K01580
Human Diseases	Cancer: overview	Proteoglycans in cancer	1	gene6349	ko05205	K03685
Cellular Processes	Cell growth and death	Meiosis - yeast	1	gene6994	ko04113	K01768
Genetic Information Processing	Folding, sorting and degradation	RNA degradation	14	gene0146;gene0307;gene0604;gene1082;gene3410;gene4611;gene4671;gene6159;gene6228;gene6236;gene6574;gene7295;gene7540;gene7766	ko03018;ko03018;ko03018;ko03018;ko03018;ko03018;ko03018;ko03018;ko03018;ko03018;ko03018;ko03018;ko03018;ko03018	K04043;K04077;K01689;K08300;K01689;K22468;K04043;K03654;K12574;K00962;K03628;K03654;K00937;K00970
Human Diseases	Cancer: specific types	Prostate cancer	1	gene5129	ko05215	K04079
Environmental Information Processing	Signal transduction	MAPK signaling pathway - yeast	4	gene3681;gene5800;gene6730;gene6886	ko04011;ko04011;ko04011;ko04011	K03781;K03781;K03781;K03781
Metabolism	Carbohydrate metabolism	Inositol phosphate metabolism	20	gene0943;gene0944;gene0946;gene0947;gene0948;gene1386;gene1700;gene2606;gene2624;gene2736;gene3658;gene4266;gene4946;gene4947;gene5615;gene5762;gene6066;gene6123;gene6442;gene7763	ko00562;ko00562;ko00562;ko00562;ko00562;ko00562;ko00562;ko00562;ko00562;ko00562;ko00562;ko00562;ko00562;ko00562;ko00562;ko00562;ko00562;ko00562;ko00562;ko00562	K03335;K03338;K03337;K03336;K00140;K21302;K01803;K01092;K01771;K01114;K01114;K01092;K00010;K01858;K01114;K00010;K01092;K01858;K01114;K01858
Human Diseases	Cancer: specific types	Bladder cancer	1	gene7030	ko05219	K00758
Metabolism	Biosynthesis of other secondary metabolites	Carbapenem biosynthesis	2	gene1092;gene1094	ko00332;ko00332	K00931;K00147
Metabolism	Global and overview maps	Metabolic pathways	1071	gene0003;gene0040;gene0041;gene0042;gene0043;gene0044;gene0049;gene0052;gene0053;gene0054;gene0056;gene0066;gene0067;gene0068;gene0086;gene0121;gene0138;gene0154;gene0158;gene0161;gene0163;gene0164;gene0165;gene0169;gene0170;gene0178;gene0184;gene0195;gene0196;gene0203;gene0224;gene0256;gene0263;gene0264;gene0296;gene0297;gene0298;gene0301;gene0302;gene0304;gene0308;gene0324;gene0327;gene0328;gen…	ko01100;ko01100;ko01100;ko01100;ko01100;ko01100;ko01100;ko01100;ko01100;ko01100;ko01100;ko01100;ko01100;ko01100;ko01100;ko01100;ko01100;ko01100;ko01100;ko01100;ko01100;ko01100;ko01100;ko01100;ko01100;ko01100;ko01100;ko01100;ko01100;ko01100;ko01100;ko01100;ko01100;ko01100;ko01100;ko01100;ko01100;ko01100;ko01100;ko01100;ko01100;ko01100;ko01100;ko01100;ko01100;ko01100;ko01100;ko01100;ko01100;ko01100…	K00033;K02613;K02612;K02611;K02610;K02609;K00074;K00166;K00167;K09699;K03750;K00166;K00167;K09699;K01874;K05606;K01494;K23825;K14267;K00797;K01785;K00762;K01624;K00453;K01556;K01939;K15372;K00928;K00133;K01077;K01011;K01834;K00991;K01770;K00917;K01443;K25026;K01087;K00697;K01733;K07106;K01091;K11785;K11783;K00831;K01965;K01692;K01647;K00275;K04116;K16048;K15866;K24012;K00275;K18687;K00038;K11779;…
Human Diseases	Neurodegenerative disease	Parkinson disease	5	gene3828;gene4214;gene5367;gene6494;gene7773	ko05012;ko05012;ko05012;ko05012;ko05012	K03671;K03671;K03671;K03671;K03671
Genetic Information Processing	Folding, sorting and degradation	Sulfur relay system	14	gene0221;gene0224;gene0305;gene0517;gene0799;gene0800;gene1459;gene1508;gene1814;gene6072;gene6449;gene6450;gene6739;gene6765	ko04122;ko04122;ko04122;ko04122;ko04122;ko04122;ko04122;ko04122;ko04122;ko04122;ko04122;ko04122;ko04122;ko04122	K03636;K01011;K03636;K03637;K03636;K21148;K04487;K03154;K03639;K01011;K00566;K04487;K03635;K21147
Organismal Systems	Digestive system	Cholesterol metabolism	1	gene3007	ko04979	K05770
Organismal Systems	Endocrine system	Insulin signaling pathway	3	gene2666;gene6487;gene6955	ko04910;ko04910;ko04910	K07192;K00688;K01596
Metabolism	Carbohydrate metabolism	Galactose metabolism	29	gene0163;gene0296;gene0298;gene0515;gene0554;gene0555;gene0556;gene1091;gene1390;gene1394;gene1488;gene1495;gene1630;gene1637;gene2289;gene2431;gene2504;gene2723;gene3126;gene3132;gene3183;gene3184;gene5189;gene5451;gene5501;gene5660;gene5756;gene6088;gene7393	ko00052;ko00052;ko00052;ko00052;ko00052;ko00052;ko00052;ko00052;ko00052;ko00052;ko00052;ko00052;ko00052;ko00052;ko00052;ko00052;ko00052;ko00052;ko00052;ko00052;ko00052;ko00052;ko00052;ko00052;ko00052;ko00052;ko00052;ko00052;ko00052	K01785;K00917;K25026;K00963;K00965;K01784;K00849;K01784;K01187;K01187;K25026;K21071;K12308;K07407;K01187;K21071;K25026;K07406;K01785;K01684;K07407;K12308;K04618;K01187;K07407;K01190;K25026;K01187;K01784
Metabolism	Biosynthesis of other secondary metabolites	Betalain biosynthesis	3	gene0490;gene2677;pA_gene0094	ko00965;ko00965;ko00965	K15777;K00505;K00505
Human Diseases	Cardiovascular disease	Fluid shear stress and atherosclerosis	8	gene2092;gene3828;gene4214;gene4988;gene5129;gene5367;gene6494;gene7773	ko05418;ko05418;ko05418;ko05418;ko05418;ko05418;ko05418;ko05418	K01940;K03671;K03671;K00355;K04079;K03671;K03671;K03671
Environmental Information Processing	Membrane transport	Bacterial secretion system	15	gene0201;gene0704;gene0832;gene1701;gene2039;gene2040;gene2152;gene2153;gene2154;gene6332;gene6338;gene6797;gene7198;gene7240;gene7779	ko03070;ko03070;ko03070;ko03070;ko03070;ko03070;ko03070;ko03070;ko03070;ko03070;ko03070;ko03070;ko03070;ko03070;ko03070	K03116;K03070;K03217;K03075;K03116;K03118;K03210;K03072;K03074;K03106;K03110;K03117;K03076;K03073;K03217
Metabolism	Carbohydrate metabolism	Starch and sucrose metabolism	44	gene0298;gene0301;gene0302;gene0515;gene0848;gene0889;gene1014;gene1023;gene1390;gene1394;gene1488;gene1688;gene1703;gene2218;gene2289;gene2295;gene2352;gene2504;gene2595;gene2650;gene3091;gene3092;gene3350;gene3574;gene4411;gene4429;gene4461;gene4507;gene5023;gene5451;gene5756;gene5935;gene5937;gene5944;gene5945;gene6088;gene6479;gene6487;gene6489;gene6490;gene6491;gene6492;gene6526;gene7528	ko00500;ko00500;ko00500;ko00500;ko00500;ko00500;ko00500;ko00500;ko00500;ko00500;ko00500;ko00500;ko00500;ko00500;ko00500;ko00500;ko00500;ko00500;ko00500;ko00500;ko00500;ko00500;ko00500;ko00500;ko00500;ko00500;ko00500;ko00500;ko00500;ko00500;ko00500;ko00500;ko00500;ko00500;ko00500;ko00500;ko00500;ko00500;ko00500;ko00500;ko00500;ko00500;ko00500;ko00500	K25026;K01087;K00697;K00963;K01179;K05350;K01222;K00705;K01187;K01187;K25026;K00847;K01810;K01179;K01187;K02777;K05349;K25026;K01176;K05350;K19668;K01179;K01179;K01179;K05349;K16148;K00978;K00847;K00694;K01187;K25026;K01214;K06044;K05350;K01236;K01187;K01214;K00688;K16147;K05343;K16146;K00700;K01179;K01222
Metabolism	Lipid metabolism	Ether lipid metabolism	5	gene2736;gene3019;gene3658;gene5615;gene6442	ko00565;ko00565;ko00565;ko00565;ko00565	K01114;K00803;K01114;K01114;K01114
Organismal Systems	Aging	Longevity regulating pathway - worm	12	gene0146;gene0307;gene0563;gene1063;gene1064;gene2418;gene3230;gene3681;gene4671;gene5800;gene6730;gene6886	ko04212;ko04212;ko04212;ko04212;ko04212;ko04212;ko04212;ko04212;ko04212;ko04212;ko04212;ko04212	K04043;K04077;K00507;K01358;K01358;K01358;K00507;K03781;K04043;K03781;K03781;K03781
Metabolism	Metabolism of other amino acids	Phosphonate and phosphinate metabolism	1	gene3295	ko00440	K03823
Metabolism	Amino acid metabolism	Arginine and proline metabolism	40	gene0161;gene0920;gene1092;gene1094;gene1300;gene1946;gene1947;gene2956;gene3401;gene3640;gene3685;gene4080;gene4432;gene4532;gene4757;gene4758;gene4760;gene4906;gene4980;gene5015;gene5085;gene5117;gene5462;gene5468;gene5505;gene5537;gene5820;gene5870;gene6008;gene6009;gene6401;gene6418;gene6419;gene6591;gene7012;gene7074;gene7242;gene7253;gene7404;gene7474	ko00330;ko00330;ko00330;ko00330;ko00330;ko00330;ko00330;ko00330;ko00330;ko00330;ko00330;ko00330;ko00330;ko00330;ko00330;ko00330;ko00330;ko00330;ko00330;ko00330;ko00330;ko00330;ko00330;ko00330;ko00330;ko00330;ko00330;ko00330;ko00330;ko00330;ko00330;ko00330;ko00330;ko00330;ko00330;ko00330;ko00330;ko00330;ko00330;ko00330	K00797;K01480;K00931;K00147;K00128;K00128;K00128;K10536;K01426;K00128;K01585;K00491;K01470;K01426;K21062;K22549;K21061;K01426;K01259;K01476;K01426;K00128;K09251;K00491;K00819;K00273;K01470;K00273;K01777;K21062;K10536;K00294;K00318;K03365;K00128;K00819;K00812;K01485;K00286;K00128
Organismal Systems	Immune system	IL-17 signaling pathway	1	gene5129	ko04657	K04079
Genetic Information Processing	Folding, sorting and degradation	Protein export	22	gene0201;gene0704;gene0832;gene1545;gene1701;gene2039;gene2040;gene2094;gene2152;gene2153;gene2154;gene3545;gene6319;gene6320;gene6321;gene6322;gene6332;gene6338;gene6797;gene7198;gene7240;gene7779	ko03060;ko03060;ko03060;ko03060;ko03060;ko03060;ko03060;ko03060;ko03060;ko03060;ko03060;ko03060;ko03060;ko03060;ko03060;ko03060;ko03060;ko03060;ko03060;ko03060;ko03060;ko03060	K03116;K03070;K03217;K03101;K03075;K03116;K03118;K03100;K03210;K03072;K03074;K03100;K03100;K03100;K03100;K03100;K03106;K03110;K03117;K03076;K03073;K03217
Metabolism	Xenobiotics biodegradation and metabolism	Caprolactam degradation	7	gene0361;gene1613;gene2343;gene2695;gene3267;gene5545;gene6041	ko00930;ko00930;ko00930;ko00930;ko00930;ko00930;ko00930	K01692;K01692;K01692;K01692;K01053;K01782;K01692
Environmental Information Processing	Signal transduction	AMPK signaling pathway	3	gene0563;gene3230;gene6955	ko04152;ko04152;ko04152	K00507;K00507;K01596
Metabolism	Global and overview maps	2-Oxocarboxylic acid metabolism	36	gene0195;gene0196;gene0364;gene0452;gene0921;gene0938;gene1033;gene1153;gene1671;gene1761;gene2086;gene2087;gene2088;gene2089;gene2123;gene3055;gene3056;gene3085;gene3472;gene4343;gene5484;gene6176;gene6369;gene6370;gene6398;gene6405;gene6406;gene6423;gene6424;gene6425;gene6813;gene6947;gene7242;gene7380;gene7408;gene7430	ko01210;ko01210;ko01210;ko01210;ko01210;ko01210;ko01210;ko01210;ko01210;ko01210;ko01210;ko01210;ko01210;ko01210;ko01210;ko01210;ko01210;ko01210;ko01210;ko01210;ko01210;ko01210;ko01210;ko01210;ko01210;ko01210;ko01210;ko01210;ko01210;ko01210;ko01210;ko01210;ko01210;ko01210;ko01210;ko01210	K00928;K00133;K01647;K00928;K01652;K01647;K00133;K01649;K14260;K00836;K00145;K00620;K00930;K00821;K00826;K01647;K01647;K00826;K01652;K01652;K00031;K00836;K01704;K01703;K01649;K00826;K00052;K00053;K01653;K01652;K22476;K14260;K00812;K05825;K01687;K00619
Human Diseases	Endocrine and metabolic disease	Insulin resistance	5	gene0900;gene5058;gene6487;gene6704;gene6955	ko04931;ko04931;ko04931;ko04931;ko04931	K00820;K00820;K00688;K00820;K01596
Genetic Information Processing	Replication and repair	Mismatch repair	19	gene0002;gene0996;gene1120;gene1554;gene1801;gene2135;gene2206;gene3359;gene5223;gene5933;gene6444;gene6753;gene6757;gene6873;gene6874;gene7107;gene7502;gene7637;gene7755	ko03430;ko03430;ko03430;ko03430;ko03430;ko03430;ko03430;ko03430;ko03430;ko03430;ko03430;ko03430;ko03430;ko03430;ko03430;ko03430;ko03430;ko03430;ko03430	K02338;K03111;K02340;K02337;K02342;K02342;K10747;K02338;K03657;K02342;K01972;K03657;K03657;K03601;K03602;K03657;K02341;K02343;K03111
Metabolism	Xenobiotics biodegradation and metabolism	Benzoate degradation	34	gene0049;gene0361;gene0384;gene0620;gene1292;gene1317;gene1607;gene1613;gene1898;gene2074;gene2343;gene2695;gene2698;gene2831;gene2903;gene2923;gene3848;gene4913;gene4920;gene4931;gene5339;gene5545;gene5546;gene5608;gene5609;gene5700;gene5734;gene5754;gene5812;gene5867;gene5984;gene6041;gene6536;gene6550	ko00362;ko00362;ko00362;ko00362;ko00362;ko00362;ko00362;ko00362;ko00362;ko00362;ko00362;ko00362;ko00362;ko00362;ko00362;ko00362;ko00362;ko00362;ko00362;ko00362;ko00362;ko00362;ko00362;ko00362;ko00362;ko00362;ko00362;ko00362;ko00362;ko00362;ko00362;ko00362;ko00362;ko00362	K00074;K01692;K04116;K00626;K00626;K00632;K00626;K01692;K00252;K00074;K01692;K01692;K00626;K00626;K01857;K01055;K10218;K01075;K01607;K00481;K00074;K01782;K00626;K00448;K00449;K00074;K00632;K14727;K01821;K03464;K00632;K01692;K00626;K00074
Metabolism	Metabolism of cofactors and vitamins	Ubiquinone and other terpenoid-quinone biosynthesis	18	gene0327;gene0328;gene0630;gene0784;gene1648;gene4913;gene4988;gene5333;gene6290;gene7281;gene7320;gene7322;gene7325;gene7337;gene7340;gene7341;gene7342;gene7482	ko00130;ko00130;ko00130;ko00130;ko00130;ko00130;ko00130;ko00130;ko00130;ko00130;ko00130;ko00130;ko00130;ko00130;ko00130;ko00130;ko00130;ko00130	K11785;K11783;K19267;K00457;K19222;K01075;K00355;K03809;K18286;K19267;K03183;K11784;K11782;K18285;K03186;K03179;K03182;K19267
Metabolism	Carbohydrate metabolism	Ascorbate and aldarate metabolism	16	gene0655;gene1138;gene1300;gene1741;gene1742;gene1946;gene1947;gene1984;gene3267;gene3587;gene3640;gene4748;gene5117;gene5823;gene7012;gene7474	ko00053;ko00053;ko00053;ko00053;ko00053;ko00053;ko00053;ko00053;ko00053;ko00053;ko00053;ko00053;ko00053;ko00053;ko00053;ko00053	K00012;K01706;K00128;K18981;K01707;K00128;K00128;K00064;K01053;K00064;K00128;K03077;K00128;K20023;K00128;K00128
Metabolism	Glycan biosynthesis and metabolism	Mannose type O-glycan biosynthesis	1	gene0543	ko00515	K00728
Metabolism	Amino acid metabolism	Histidine metabolism	27	gene0626;gene0629;gene1300;gene1564;gene1565;gene1566;gene1568;gene1569;gene1571;gene1573;gene1766;gene1946;gene1947;gene2229;gene2230;gene3640;gene3954;gene5117;gene5385;gene5386;gene5387;gene6728;gene6991;gene7012;gene7474;gene7729;pB_gene0010	ko00340;ko00340;ko00340;ko00340;ko00340;ko00340;ko00340;ko00340;ko00340;ko00340;ko00340;ko00340;ko00340;ko00340;ko00340;ko00340;ko00340;ko00340;ko00340;ko00340;ko00340;ko00340;ko00340;ko00340;ko00340;ko00340;ko00340	K01712;K01468;K00128;K00013;K00817;K01693;K02501;K24017;K02500;K01496;K00817;K00128;K00128;K01523;K00765;K00128;K01590;K00128;K18912;K07008;K18911;K05602;K01745;K00128;K00128;K00817;K01590
Metabolism	Biosynthesis of other secondary metabolites	Streptomycin biosynthesis	20	gene0298;gene0720;gene0721;gene0722;gene0723;gene1488;gene2504;gene2606;gene4266;gene4468;gene4886;gene4946;gene4947;gene5756;gene5762;gene6066;gene6123;gene7763;pA_gene0016;pA_gene0019	ko00521;ko00521;ko00521;ko00521;ko00521;ko00521;ko00521;ko00521;ko00521;ko00521;ko00521;ko00521;ko00521;ko00521;ko00521;ko00521;ko00521;ko00521;ko00521;ko00521	K25026;K01790;K00067;K01710;K00973;K25026;K25026;K01092;K01092;K01790;K01710;K00010;K01858;K25026;K00010;K01092;K01858;K01858;K00973;K01710
Environmental Information Processing	Signal transduction	Sphingolipid signaling pathway	1	gene2479	ko04071	K12349
Metabolism	Global and overview maps	Carbon metabolism	139	gene0003;gene0049;gene0121;gene0165;gene0256;gene0298;gene0350;gene0358;gene0364;gene0564;gene0567;gene0604;gene0620;gene0753;gene0913;gene0938;gene0948;gene0967;gene1050;gene1162;gene1163;gene1164;gene1186;gene1246;gene1292;gene1329;gene1336;gene1430;gene1432;gene1433;gene1488;gene1495;gene1513;gene1607;gene1638;gene1698;gene1699;gene1700;gene1703;gene1705;gene1707;gene1708;gene1709;gene1829;gen…	ko01200;ko01200;ko01200;ko01200;ko01200;ko01200;ko01200;ko01200;ko01200;ko01200;ko01200;ko01200;ko01200;ko01200;ko01200;ko01200;ko01200;ko01200;ko01200;ko01200;ko01200;ko01200;ko01200;ko01200;ko01200;ko01200;ko01200;ko01200;ko01200;ko01200;ko01200;ko01200;ko01200;ko01200;ko01200;ko01200;ko01200;ko01200;ko01200;ko01200;ko01200;ko01200;ko01200;ko01200;ko01200;ko01200;ko01200;ko01200;ko01200;ko01200…	K00033;K00074;K05606;K01624;K01834;K25026;K00831;K01965;K01647;K01595;K00948;K01689;K00626;K00027;K11263;K01647;K00140;K00616;K01808;K00175;K00174;K11263;K01006;K00163;K00626;K00121;K01625;K00163;K00627;K00382;K25026;K21071;K00297;K00626;K00873;K00134;K00927;K01803;K01810;K01057;K00036;K00616;K00615;K01079;K00121;K00851;K00074;K01783;K00281;K21071;K07404;K25026;K01738;K01847;K01847;K00626;K00626;…
Organismal Systems	Endocrine system	Prolactin signaling pathway	1	gene0554	ko04917	K00965
Metabolism	Metabolism of cofactors and vitamins	One carbon pool by folate	17	gene0377;gene0514;gene1513;gene2015;gene2199;gene2789;gene3673;gene3674;gene4217;gene6230;gene6465;gene6467;gene6567;gene7073;gene7089;gene7091;gene7092	ko00670;ko00670;ko00670;ko00670;ko00670;ko00670;ko00670;ko00670;ko00670;ko00670;ko00670;ko00670;ko00670;ko00670;ko00670;ko00670;ko00670	K01433;K01934;K00297;K00548;K00604;K11175;K00560;K00287;K00604;K03465;K00605;K00600;K00600;K00600;K01491;K00602;K11175
Metabolism	Carbohydrate metabolism	Propanoate metabolism	48	gene0052;gene0053;gene0054;gene0066;gene0067;gene0068;gene0121;gene0358;gene0361;gene0398;gene0499;gene0620;gene0913;gene0948;gene1164;gene1292;gene1433;gene1607;gene1613;gene1803;gene2343;gene2671;gene2672;gene2695;gene2698;gene2831;gene2832;gene3990;gene4596;gene5545;gene5546;gene5727;gene5811;gene5940;gene6041;gene6278;gene6510;gene6511;gene6523;gene6536;gene6537;gene6996;gene7001;gene7045;gen…	ko00640;ko00640;ko00640;ko00640;ko00640;ko00640;ko00640;ko00640;ko00640;ko00640;ko00640;ko00640;ko00640;ko00640;ko00640;ko00640;ko00640;ko00640;ko00640;ko00640;ko00640;ko00640;ko00640;ko00640;ko00640;ko00640;ko00640;ko00640;ko00640;ko00640;ko00640;ko00640;ko00640;ko00640;ko00640;ko00640;ko00640;ko00640;ko00640;ko00640;ko00640;ko00640;ko00640;ko00640;ko00640;ko00640;ko00640;ko00640	K00166;K00167;K09699;K00166;K00167;K09699;K05606;K01965;K01692;K24012;K00656;K00626;K11263;K00140;K11263;K00626;K00382;K00626;K01692;K01574;K01692;K01847;K01847;K01692;K00626;K00626;K01895;K18471;K18369;K01782;K00626;K00823;K01895;K00382;K01692;K07250;K13788;K00925;K01848;K00626;K05606;K01966;K11263;K01848;K01902;K01903;K01849;K01895
Metabolism	Metabolism of cofactors and vitamins	Vitamin B6 metabolism	10	gene0304;gene0350;gene0365;gene0403;gene2146;gene2147;gene2911;gene5013;gene5108;gene6856	ko00750;ko00750;ko00750;ko00750;ko00750;ko00750;ko00750;ko00750;ko00750;ko00750	K01733;K00831;K00275;K00275;K06215;K08681;K00275;K01733;K05275;K01733
Metabolism	Amino acid metabolism	Alanine, aspartate and glutamate metabolism	42	gene0178;gene0447;gene0632;gene0709;gene0900;gene1411;gene1417;gene1592;gene1593;gene1671;gene1869;gene2053;gene2092;gene2093;gene2185;gene2188;gene2189;gene2205;gene2399;gene3642;gene3749;gene4454;gene4887;gene5058;gene5254;gene5470;gene5471;gene5727;gene6137;gene6138;gene6278;gene6418;gene6704;gene6947;gene7126;gene7242;gene7319;gene7436;gene7472;gene7619;gene7624;pA_gene0070	ko00250;ko00250;ko00250;ko00250;ko00250;ko00250;ko00250;ko00250;ko00250;ko00250;ko00250;ko00250;ko00250;ko00250;ko00250;ko00250;ko00250;ko00250;ko00250;ko00250;ko00250;ko00250;ko00250;ko00250;ko00250;ko00250;ko00250;ko00250;ko00250;ko00250;ko00250;ko00250;ko00250;ko00250;ko00250;ko00250;ko00250;ko00250;ko00250;ko00250;ko00250;ko00250	K01939;K01953;K01779;K15371;K00820;K01915;K01915;K00265;K00266;K14260;K00259;K01915;K01940;K01755;K00609;K01956;K01955;K01915;K01756;K01953;K01915;K01953;K01955;K00820;K01953;K00261;K01756;K00823;K01915;K01756;K07250;K00294;K00820;K14260;K00135;K00812;K01425;K00278;K01580;K00764;K23265;K01953
Metabolism	Amino acid metabolism	Glycine, serine and threonine metabolism	54	gene0195;gene0196;gene0256;gene0304;gene0350;gene0452;gene0621;gene0907;gene1033;gene1433;gene1580;gene1581;gene1634;gene1759;gene1760;gene1761;gene1762;gene1829;gene2271;gene2273;gene2275;gene2276;gene2310;gene2493;gene2676;gene2914;gene4078;gene4420;gene4790;gene5013;gene5537;gene5557;gene5601;gene5602;gene5708;gene5709;gene5870;gene5940;gene6176;gene6287;gene6294;gene6422;gene6465;gene6466;gen…	ko00260;ko00260;ko00260;ko00260;ko00260;ko00260;ko00260;ko00260;ko00260;ko00260;ko00260;ko00260;ko00260;ko00260;ko00260;ko00260;ko00260;ko00260;ko00260;ko00260;ko00260;ko00260;ko00260;ko00260;ko00260;ko00260;ko00260;ko00260;ko00260;ko00260;ko00260;ko00260;ko00260;ko00260;ko00260;ko00260;ko00260;ko00260;ko00260;ko00260;ko00260;ko00260;ko00260;ko00260;ko00260;ko00260;ko00260;ko00260;ko00260;ko00260…	K00928;K00133;K01834;K01733;K00831;K00928;K01697;K13745;K00133;K00382;K01696;K01695;K13745;K10674;K06720;K00836;K06718;K01079;K17755;K00130;K00301;K00309;K00281;K01620;K01697;K02437;K00276;K06720;K01754;K01733;K00273;K00108;K00639;K00060;K17103;K00865;K00273;K00382;K00836;K00130;K00130;K00058;K00605;K02437;K00600;K01752;K00600;K00872;K00003;K01733;K01754;K00600;K01758;K01079
Metabolism	Metabolism of terpenoids and polyketides	Biosynthesis of enediyne antibiotics	7	gene1160;gene2605;gene3296;gene3987;gene4428;gene6767;pA_gene0020	ko01059;ko01059;ko01059;ko01059;ko01059;ko01059;ko01059	K20420;K20420;K21159;K20420;K21210;K21214;K21214
Metabolism	Global and overview maps	Biosynthesis of cofactors	195	gene0023;gene0056;gene0164;gene0169;gene0170;gene0178;gene0203;gene0327;gene0328;gene0350;gene0365;gene0403;gene0515;gene0516;gene0517;gene0630;gene0655;gene0667;gene0670;gene0680;gene0748;gene0784;gene0793;gene0794;gene1070;gene1072;gene1100;gene1234;gene1300;gene1335;gene1367;gene1369;gene1421;gene1422;gene1433;gene1440;gene1444;gene1445;gene1454;gene1459;gene1507;gene1509;gene1512;gene1550;gen…	ko01240;ko01240;ko01240;ko01240;ko01240;ko01240;ko01240;ko01240;ko01240;ko01240;ko01240;ko01240;ko01240;ko01240;ko01240;ko01240;ko01240;ko01240;ko01240;ko01240;ko01240;ko01240;ko01240;ko01240;ko01240;ko01240;ko01240;ko01240;ko01240;ko01240;ko01240;ko01240;ko01240;ko01240;ko01240;ko01240;ko01240;ko01240;ko01240;ko01240;ko01240;ko01240;ko01240;ko01240;ko01240;ko01240;ko01240;ko01240;ko01240;ko01240…	K01664;K03750;K00762;K00453;K01556;K01939;K01077;K11785;K11783;K00831;K00275;K00275;K00963;K03750;K03637;K19267;K00012;K00966;K11212;K01809;K01719;K00457;K08281;K00763;K11754;K00940;K00969;K09458;K00128;K22316;K00606;K01950;K03644;K03801;K00382;K02233;K00768;K02231;K03517;K04487;K03149;K03153;K00788;K01113;K00059;K00873;K19222;K00859;K02257;K02259;K09458;K03795;K06042;K13541;K00595;K05936;K03394;…
Cellular Processes	Transport and catabolism	Lysosome	8	gene0758;gene0903;gene1021;gene2735;gene2908;gene2966;gene3596;gene7050	ko04142;ko04142;ko04142;ko04142;ko04142;ko04142;ko04142;ko04142	K12373;K12373;K01197;K01186;K01206;K12373;K01206;K12373
Human Diseases	Neurodegenerative disease	Amyotrophic lateral sclerosis	6	gene2437;gene3681;gene5019;gene5800;gene6730;gene6886	ko05014;ko05014;ko05014;ko05014;ko05014;ko05014	K00432;K03781;K04565;K03781;K03781;K03781
Genetic Information Processing	Transcription	Basal transcription factors	1	gene0321	ko03022	K10843
Metabolism	Metabolism of terpenoids and polyketides	Sesquiterpenoid and triterpenoid biosynthesis	2	gene5510;gene7643	ko00909;ko00909	K06045;K10187
Organismal Systems	Excretory system	Proximal tubule bicarbonate reclamation	3	gene5470;gene6955;gene7319	ko04964;ko04964;ko04964	K00261;K01596;K01425
Metabolism	Nucleotide metabolism	Purine metabolism	76	gene0178;gene0567;gene0600;gene0607;gene0651;gene0652;gene0808;gene1072;gene1137;gene1204;gene1458;gene1636;gene1638;gene2139;gene2155;gene2156;gene2193;gene2209;gene2399;gene2420;gene2421;gene2422;gene2456;gene2457;gene2458;gene2662;gene2789;gene2982;gene2983;gene2984;gene3358;gene3544;gene5069;gene5471;gene5686;gene5768;gene5769;gene5793;gene5794;gene5795;gene5801;gene5914;gene5915;gene5916;gen…	ko00230;ko00230;ko00230;ko00230;ko00230;ko00230;ko00230;ko00230;ko00230;ko00230;ko00230;ko00230;ko00230;ko00230;ko00230;ko00230;ko00230;ko00230;ko00230;ko00230;ko00230;ko00230;ko00230;ko00230;ko00230;ko00230;ko00230;ko00230;ko00230;ko00230;ko00230;ko00230;ko00230;ko00230;ko00230;ko00230;ko00230;ko00230;ko00230;ko00230;ko00230;ko00230;ko00230;ko00230;ko00230;ko00230;ko00230;ko00230;ko00230;ko00230…	K01939;K00948;K02428;K01524;K01589;K01588;K02428;K00940;K01488;K01129;K00856;K01119;K00873;K19710;K00759;K01139;K00942;K00088;K01756;K01430;K01429;K01428;K13483;K11178;K11177;K01488;K11175;K13483;K11178;K11177;K00088;K01081;K16842;K01756;K01488;K01477;K01466;K00365;K07127;K16840;K05873;K00860;K00957;K00956;K01756;K00525;K01139;K01428;K14048;K00873;K00525;K00526;K01768;K03783;K01488;K16840;K00602;…
Metabolism	Global and overview maps	Fatty acid metabolism	72	gene0361;gene0485;gene0563;gene0620;gene0913;gene0918;gene0968;gene1123;gene1164;gene1234;gene1236;gene1237;gene1292;gene1317;gene1483;gene1605;gene1607;gene1613;gene1739;gene1797;gene1821;gene1963;gene1965;gene2333;gene2343;gene2614;gene2691;gene2695;gene2698;gene2779;gene2831;gene2837;gene3030;gene3187;gene3210;gene3230;gene3314;gene3317;gene3335;gene3391;gene3629;gene3631;gene3633;gene3634;gen…	ko01212;ko01212;ko01212;ko01212;ko01212;ko01212;ko01212;ko01212;ko01212;ko01212;ko01212;ko01212;ko01212;ko01212;ko01212;ko01212;ko01212;ko01212;ko01212;ko01212;ko01212;ko01212;ko01212;ko01212;ko01212;ko01212;ko01212;ko01212;ko01212;ko01212;ko01212;ko01212;ko01212;ko01212;ko01212;ko01212;ko01212;ko01212;ko01212;ko01212;ko01212;ko01212;ko01212;ko01212;ko01212;ko01212;ko01212;ko01212;ko01212;ko01212…	K01692;K01897;K00507;K00626;K11263;K00249;K00648;K01897;K11263;K09458;K00648;K00645;K00626;K00632;K01897;K00059;K00626;K01692;K09458;K00059;K00059;K01897;K00249;K00059;K01692;K09458;K01897;K01692;K00626;K00059;K00626;K00648;K00059;K00059;K00249;K00507;K00648;K00648;K00059;K00059;K09458;K02372;K00059;K00645;K01897;K22769;K22770;K00249;K09458;K01897;K00209;K00059;K09458;K00059;K00059;K01782;K00626;…
Metabolism	Biosynthesis of other secondary metabolites	Monobactam biosynthesis	15	gene0195;gene0196;gene0452;gene1033;gene1730;gene2592;gene2872;gene4321;gene4322;gene4323;gene4328;gene5915;gene5916;gene6229;gene6234	ko00261;ko00261;ko00261;ko00261;ko00261;ko00261;ko00261;ko00261;ko00261;ko00261;ko00261;ko00261;ko00261;ko00261;ko00261	K00928;K00133;K00928;K00133;K01714;K01714;K05375;K16423;K16422;K16421;K05375;K00957;K00956;K01714;K00215
Metabolism	Metabolism of other amino acids	Glutathione metabolism	18	gene0003;gene0161;gene1029;gene1040;gene1434;gene1633;gene1707;gene2262;gene2265;gene2437;gene2981;gene3113;gene3670;gene5384;gene5425;gene5484;gene5722;gene5738	ko00480;ko00480;ko00480;ko00480;ko00480;ko00480;ko00480;ko00480;ko00480;ko00480;ko00480;ko00480;ko00480;ko00480;ko00480;ko00480;ko00480;ko00480	K00033;K00797;K01256;K01256;K01255;K01256;K00036;K01469;K07160;K00432;K06048;K06048;K06048;K01919;K00033;K00031;K00681;K00681
Metabolism	Biosynthesis of other secondary metabolites	Caffeine metabolism	1	gene5793	ko00232	K00365
Human Diseases	Cancer: overview	Chemical carcinogenesis - reactive oxygen species	6	gene3681;gene4988;gene5019;gene5800;gene6730;gene6886	ko05208;ko05208;ko05208;ko05208;ko05208;ko05208	K03781;K00355;K04565;K03781;K03781;K03781
Metabolism	Metabolism of cofactors and vitamins	Porphyrin and chlorophyll metabolism	49	gene0154;gene0748;gene1335;gene1357;gene1370;gene1440;gene1444;gene1445;gene1502;gene1710;gene1713;gene1767;gene1768;gene1769;gene1770;gene1771;gene1773;gene1774;gene1775;gene1776;gene1777;gene1778;gene1779;gene2108;gene2109;gene2110;gene2755;gene3186;gene3190;gene4469;gene4602;gene4937;gene5442;gene5443;gene5977;gene5978;gene5980;gene6067;gene6157;gene6380;gene6551;gene6650;gene7351;gene7383;gen…	ko00860;ko00860;ko00860;ko00860;ko00860;ko00860;ko00860;ko00860;ko00860;ko00860;ko00860;ko00860;ko00860;ko00860;ko00860;ko00860;ko00860;ko00860;ko00860;ko00860;ko00860;ko00860;ko00860;ko00860;ko00860;ko00860;ko00860;ko00860;ko00860;ko00860;ko00860;ko00860;ko00860;ko00860;ko00860;ko00860;ko00860;ko00860;ko00860;ko00860;ko00860;ko00860;ko00860;ko00860;ko00860;ko00860;ko00860;ko00860;ko00860	K23825;K01719;K22316;K21480;K22552;K02233;K00768;K02231;K03594;K02257;K02259;K03795;K06042;K13541;K00595;K05936;K03394;K02224;K19221;K03404;K02230;K02232;K02227;K00595;K00768;K02302;K01749;K02495;K01885;K01845;K00230;K01845;K02228;K05895;K00435;K00231;K01599;K01772;K23825;K01885;K00798;K23825;K01845;K01698;K13542;K01749;K02492;K23825;K23825
Human Diseases	Cancer: specific types	Hepatocellular carcinoma	1	gene4988	ko05225	K00355
Organismal Systems	Nervous system	GABAergic synapse	8	gene1411;gene1417;gene2053;gene2205;gene3749;gene6137;gene7319;gene7472	ko04727;ko04727;ko04727;ko04727;ko04727;ko04727;ko04727;ko04727	K01915;K01915;K01915;K01915;K01915;K01915;K01425;K01580
Human Diseases	Endocrine and metabolic disease	Cushing syndrome	1	gene6883	ko04934	K01679
Metabolism	Xenobiotics biodegradation and metabolism	Ethylbenzene degradation	3	gene1317;gene5734;gene5984	ko00642;ko00642;ko00642	K00632;K00632;K00632
Metabolism	Metabolism of cofactors and vitamins	Riboflavin metabolism	8	gene2224;gene2225;gene2227;gene2228;gene5345;gene5378;gene5822;gene6255	ko00740;ko00740;ko00740;ko00740;ko00740;ko00740;ko00740;ko00740	K11752;K00793;K14652;K00794;K00299;K20862;K20862;K11753
Environmental Information Processing	Membrane transport	Phosphotransferase system (PTS)	6	gene0682;gene0803;gene0804;gene2294;gene2295;gene6078	ko02060;ko02060;ko02060;ko02060;ko02060;ko02060	K02770;K02804;K02804;K08483;K02777;K02784
Metabolism	Energy metabolism	Methane metabolism	31	gene0165;gene0256;gene0350;gene0432;gene0564;gene0604;gene0669;gene0670;gene1329;gene1495;gene1829;gene1948;gene2431;gene2832;gene2929;gene2930;gene3410;gene4189;gene5473;gene5811;gene6365;gene6422;gene6467;gene6510;gene6511;gene6567;gene6877;gene7073;gene7086;gene7524;gene7744	ko00680;ko00680;ko00680;ko00680;ko00680;ko00680;ko00680;ko00680;ko00680;ko00680;ko00680;ko00680;ko00680;ko00680;ko00680;ko00680;ko00680;ko00680;ko00680;ko00680;ko00680;ko00680;ko00680;ko00680;ko00680;ko00680;ko00680;ko00680;ko00680;ko00680;ko00680	K01624;K01834;K00831;K11779;K01595;K01689;K24998;K11212;K00121;K21071;K01079;K00121;K21071;K01895;K00124;K00123;K01689;K05979;K11261;K01895;K14941;K00058;K00600;K13788;K00925;K00600;K02446;K00600;K00024;K01895;K01079
Genetic Information Processing	Replication and repair	Homologous recombination	23	gene0002;gene0004;gene0193;gene0937;gene0996;gene1120;gene1155;gene1554;gene1650;gene1801;gene2135;gene2149;gene2150;gene2151;gene2197;gene3359;gene5933;gene6202;gene6355;gene7483;gene7502;gene7637;gene7755	ko03440;ko03440;ko03440;ko03440;ko03440;ko03440;ko03440;ko03440;ko03440;ko03440;ko03440;ko03440;ko03440;ko03440;ko03440;ko03440;ko03440;ko03440;ko03440;ko03440;ko03440;ko03440;ko03440	K02338;K03629;K06187;K03581;K03111;K02340;K03584;K02337;K02335;K02342;K02342;K01159;K03550;K03551;K04066;K02338;K02342;K03553;K03655;K02335;K02341;K02343;K03111
Metabolism	Metabolism of terpenoids and polyketides	Biosynthesis of ansamycins	2	gene1709;gene2953	ko01051;ko01051	K00615;K00615
Metabolism	Xenobiotics biodegradation and metabolism	Drug metabolism - cytochrome P450	3	gene1329;gene1948;gene4289	ko00982;ko00982;ko00982	K00121;K00121;K13953
Metabolism	Glycan biosynthesis and metabolism	Other glycan degradation	9	gene0758;gene0903;gene2634;gene2735;gene2908;gene2966;gene3596;gene5660;gene7050	ko00511;ko00511;ko00511;ko00511;ko00511;ko00511;ko00511;ko00511;ko00511	K12373;K12373;K01191;K01186;K01206;K12373;K01206;K01190;K12373
Metabolism	Metabolism of other amino acids	Selenocompound metabolism	15	gene0086;gene1721;gene2015;gene2382;gene2641;gene3388;gene3869;gene3870;gene4712;gene5915;gene5916;gene6037;gene6974;gene7740;gene7772	ko00450;ko00450;ko00450;ko00450;ko00450;ko00450;ko00450;ko00450;ko00450;ko00450;ko00450;ko00450;ko00450;ko00450;ko00450	K01874;K11717;K00548;K01761;K11717;K14155;K01042;K01008;K01008;K00957;K00956;K00549;K01739;K01758;K00384
Human Diseases	Neurodegenerative disease	Huntington disease	2	gene2437;gene5019	ko05016;ko05016	K00432;K04565
Human Diseases	Cancer: overview	Central carbon metabolism in cancer	6	gene0256;gene1638;gene1707;gene5484;gene6512;gene7319	ko05230;ko05230;ko05230;ko05230;ko05230;ko05230	K01834;K00873;K00036;K00031;K00873;K01425
Metabolism	Amino acid metabolism	Tryptophan metabolism	36	gene0169;gene0170;gene0361;gene0448;gene0620;gene1292;gene1300;gene1433;gene1607;gene1613;gene1898;gene1946;gene1947;gene2343;gene2695;gene2698;gene2831;gene2861;gene3401;gene3640;gene3681;gene4532;gene4906;gene5085;gene5117;gene5247;gene5545;gene5546;gene5800;gene5940;gene6041;gene6536;gene6730;gene6886;gene7012;gene7474	ko00380;ko00380;ko00380;ko00380;ko00380;ko00380;ko00380;ko00380;ko00380;ko00380;ko00380;ko00380;ko00380;ko00380;ko00380;ko00380;ko00380;ko00380;ko00380;ko00380;ko00380;ko00380;ko00380;ko00380;ko00380;ko00380;ko00380;ko00380;ko00380;ko00380;ko00380;ko00380;ko00380;ko00380;ko00380;ko00380	K00453;K01556;K01692;K20204;K00626;K00626;K00128;K00382;K00626;K01692;K00252;K00128;K00128;K01692;K01692;K00626;K00626;K00453;K01426;K00128;K03781;K01426;K01426;K01426;K00128;K03782;K01782;K00626;K03781;K00382;K01692;K00626;K03781;K03781;K00128;K00128
Metabolism	Lipid metabolism	Primary bile acid biosynthesis	1	gene5548	ko00120	K01796
Metabolism	Metabolism of terpenoids and polyketides	Carotenoid biosynthesis	1	gene5513	ko00906	K02291
Metabolism	Glycan biosynthesis and metabolism	Various types of N-glycan biosynthesis	4	gene0758;gene0903;gene2966;gene7050	ko00513;ko00513;ko00513;ko00513	K12373;K12373;K12373;K12373
Human Diseases	Infectious disease: bacterial	Tuberculosis	6	gene0146;gene0307;gene1009;gene1386;gene4671;gene7543	ko05152;ko05152;ko05152;ko05152;ko05152;ko05152	K04043;K04077;K14949;K21302;K04043;K02040
Metabolism	Xenobiotics biodegradation and metabolism	Styrene degradation	9	gene1612;gene1940;gene3401;gene4532;gene4906;gene5085;gene5610;gene5611;gene7294	ko00643;ko00643;ko00643;ko00643;ko00643;ko00643;ko00643;ko00643;ko00643	K01039;K00451;K01426;K01426;K01426;K01426;K01040;K01039;K01555
Metabolism	Metabolism of cofactors and vitamins	Retinol metabolism	3	gene1329;gene1948;gene4289	ko00830;ko00830;ko00830	K00121;K00121;K13953
Metabolism	Biosynthesis of other secondary metabolites	Acarbose and validamycin biosynthesis	8	gene0722;gene0723;gene0969;gene0974;gene3144;gene4886;pA_gene0016;pA_gene0019	ko00525;ko00525;ko00525;ko00525;ko00525;ko00525;ko00525;ko00525	K01710;K00973;K20431;K19969;K19969;K01710;K00973;K01710
Metabolism	Amino acid metabolism	Valine, leucine and isoleucine degradation	61	gene0052;gene0053;gene0054;gene0066;gene0067;gene0068;gene0121;gene0358;gene0361;gene0620;gene0911;gene0912;gene0913;gene0914;gene0918;gene0948;gene1164;gene1219;gene1292;gene1300;gene1317;gene1433;gene1607;gene1613;gene1946;gene1947;gene1965;gene2123;gene2290;gene2343;gene2671;gene2672;gene2695;gene2698;gene2831;gene3085;gene3210;gene3640;gene4227;gene4273;gene5117;gene5545;gene5546;gene5734;gen…	ko00280;ko00280;ko00280;ko00280;ko00280;ko00280;ko00280;ko00280;ko00280;ko00280;ko00280;ko00280;ko00280;ko00280;ko00280;ko00280;ko00280;ko00280;ko00280;ko00280;ko00280;ko00280;ko00280;ko00280;ko00280;ko00280;ko00280;ko00280;ko00280;ko00280;ko00280;ko00280;ko00280;ko00280;ko00280;ko00280;ko00280;ko00280;ko00280;ko00280;ko00280;ko00280;ko00280;ko00280;ko00280;ko00280;ko00280;ko00280;ko00280;ko00280…	K00166;K00167;K09699;K00166;K00167;K09699;K05606;K01965;K01692;K00626;K11410;K01640;K11263;K01969;K00249;K00140;K11263;K18662;K00626;K00128;K00632;K00382;K00626;K01692;K00128;K00128;K00249;K00826;K01907;K01692;K01847;K01847;K01692;K00626;K00626;K00826;K00249;K00128;K01907;K00249;K00128;K01782;K00626;K00632;K00249;K00382;K00632;K00249;K01692;K07250;K00826;K01848;K00626;K05606;K01966;K11263;K00128;…
Metabolism	Energy metabolism	Sulfur metabolism	25	gene0224;gene2450;gene2451;gene2452;gene2453;gene2533;gene4613;gene4628;gene4629;gene4630;gene5345;gene5454;gene5456;gene5457;gene5475;gene5911;gene5913;gene5914;gene5915;gene5916;gene6038;gene6072;gene6974;gene7120;gene7495	ko00920;ko00920;ko00920;ko00920;ko00920;ko00920;ko00920;ko00920;ko00920;ko00920;ko00920;ko00920;ko00920;ko00920;ko00920;ko00920;ko00920;ko00920;ko00920;ko00920;ko00920;ko00920;ko00920;ko00920;ko00920	K01011;K04091;K15553;K15555;K15554;K01738;K16937;K16951;K17994;K17993;K00299;K15553;K15554;K15555;K01082;K00392;K00390;K00860;K00957;K00956;K00380;K01011;K01739;K16937;K16937
Human Diseases	Drug resistance: antimicrobial	Cationic antimicrobial peptide (CAMP) resistance	3	gene0017;gene1314;gene4921	ko01503;ko01503;ko01503	K03767;K01448;K03673
Metabolism	Lipid metabolism	Fatty acid biosynthesis	46	gene0485;gene0913;gene0968;gene1123;gene1164;gene1234;gene1236;gene1237;gene1483;gene1605;gene1739;gene1797;gene1821;gene1963;gene2333;gene2614;gene2691;gene2779;gene2837;gene3030;gene3187;gene3314;gene3317;gene3335;gene3391;gene3629;gene3631;gene3633;gene3634;gene3643;gene4342;gene4440;gene4562;gene4833;gene4939;gene4944;gene5478;gene5556;gene5590;gene5621;gene5630;gene5871;gene6211;gene7001;gen…	ko00061;ko00061;ko00061;ko00061;ko00061;ko00061;ko00061;ko00061;ko00061;ko00061;ko00061;ko00061;ko00061;ko00061;ko00061;ko00061;ko00061;ko00061;ko00061;ko00061;ko00061;ko00061;ko00061;ko00061;ko00061;ko00061;ko00061;ko00061;ko00061;ko00061;ko00061;ko00061;ko00061;ko00061;ko00061;ko00061;ko00061;ko00061;ko00061;ko00061;ko00061;ko00061;ko00061;ko00061;ko00061;ko00061	K01897;K11263;K00648;K01897;K11263;K09458;K00648;K00645;K01897;K00059;K09458;K00059;K00059;K01897;K00059;K09458;K01897;K00059;K00648;K00059;K00059;K00648;K00648;K00059;K00059;K09458;K02372;K00059;K00645;K01897;K09458;K01897;K00209;K00059;K09458;K00059;K00059;K03921;K01897;K00648;K01897;K00648;K00059;K11263;K01897;K00059
Metabolism	Metabolism of terpenoids and polyketides	Biosynthesis of type II polyketide backbone	5	gene6148;gene6149;gene6150;gene6151;gene6152	ko01056;ko01056;ko01056;ko01056;ko01056	K05554;K12420;K05553;K05552;K05551
Cellular Processes	Cell growth and death	Apoptosis - fly	1	gene3007	ko04214	K05770
Organismal Systems	Endocrine system	Adipocytokine signaling pathway	11	gene0485;gene1123;gene1483;gene1963;gene2691;gene3643;gene4440;gene5590;gene5630;gene6955;gene7327	ko04920;ko04920;ko04920;ko04920;ko04920;ko04920;ko04920;ko04920;ko04920;ko04920;ko04920	K01897;K01897;K01897;K01897;K01897;K01897;K01897;K01897;K01897;K01596;K01897
Organismal Systems	Aging	Longevity regulating pathway - multiple species	7	gene0155;gene3681;gene5019;gene5800;gene6730;gene6886;gene6994	ko04213;ko04213;ko04213;ko04213;ko04213;ko04213;ko04213	K03695;K03781;K04565;K03781;K03781;K03781;K01768
Environmental Information Processing	Signal transduction	PI3K-Akt signaling pathway	2	gene5129;gene6955	ko04151;ko04151	K04079;K01596
Metabolism	Amino acid metabolism	Lysine degradation	30	gene0361;gene0620;gene1292;gene1300;gene1433;gene1607;gene1613;gene1898;gene1946;gene1947;gene2214;gene2215;gene2343;gene2695;gene2698;gene2831;gene3640;gene5117;gene5462;gene5545;gene5546;gene5940;gene6041;gene6278;gene6536;gene6857;gene7012;gene7126;gene7474;gene7579	ko00310;ko00310;ko00310;ko00310;ko00310;ko00310;ko00310;ko00310;ko00310;ko00310;ko00310;ko00310;ko00310;ko00310;ko00310;ko00310;ko00310;ko00310;ko00310;ko00310;ko00310;ko00310;ko00310;ko00310;ko00310;ko00310;ko00310;ko00310;ko00310;ko00310	K01692;K00626;K00626;K00128;K00382;K00626;K01692;K00252;K00128;K00128;K01506;K00468;K01692;K01692;K00626;K00626;K00128;K00128;K09251;K01782;K00626;K00382;K01692;K07250;K00626;K01506;K00128;K00135;K00128;K15736
Metabolism	Global and overview maps	Microbial metabolism in diverse environments	331	gene0003;gene0040;gene0041;gene0042;gene0043;gene0044;gene0049;gene0121;gene0158;gene0163;gene0165;gene0195;gene0196;gene0224;gene0256;gene0298;gene0304;gene0350;gene0358;gene0361;gene0364;gene0365;gene0384;gene0397;gene0398;gene0403;gene0415;gene0432;gene0452;gene0499;gene0502;gene0564;gene0567;gene0604;gene0620;gene0625;gene0669;gene0670;gene0682;gene0709;gene0748;gene0786;gene0906;gene0907;gen…	ko01120;ko01120;ko01120;ko01120;ko01120;ko01120;ko01120;ko01120;ko01120;ko01120;ko01120;ko01120;ko01120;ko01120;ko01120;ko01120;ko01120;ko01120;ko01120;ko01120;ko01120;ko01120;ko01120;ko01120;ko01120;ko01120;ko01120;ko01120;ko01120;ko01120;ko01120;ko01120;ko01120;ko01120;ko01120;ko01120;ko01120;ko01120;ko01120;ko01120;ko01120;ko01120;ko01120;ko01120;ko01120;ko01120;ko01120;ko01120;ko01120;ko01120…	K00033;K02613;K02612;K02611;K02610;K02609;K00074;K05606;K14267;K01785;K01624;K00928;K00133;K01011;K01834;K25026;K01733;K00831;K01965;K01692;K01647;K00275;K04116;K15866;K24012;K00275;K18687;K11779;K00928;K00656;K00372;K01595;K00948;K01689;K00626;K01586;K24998;K11212;K02770;K15371;K01719;K00104;K03897;K13745;K11263;K01647;K03335;K03338;K03337;K03336;K00616;K00133;K01808;K00175;K00174;K11263;K01006;…
Human Diseases	Neurodegenerative disease	Pathways of neurodegeneration - multiple diseases	6	gene2437;gene3681;gene5019;gene5800;gene6730;gene6886	ko05022;ko05022;ko05022;ko05022;ko05022;ko05022	K00432;K03781;K04565;K03781;K03781;K03781
Organismal Systems	Endocrine system	Thyroid hormone synthesis	2	gene2437;gene6416	ko04918;ko04918	K00432;K17231
Metabolism	Carbohydrate metabolism	Fructose and mannose metabolism	30	gene0165;gene0667;gene0677;gene0680;gene0682;gene1050;gene1278;gene1495;gene1688;gene1700;gene1782;gene1982;gene1984;gene2004;gene2300;gene2431;gene3587;gene3591;gene3592;gene3600;gene4450;gene4507;gene4677;gene4934;gene4952;gene5016;gene5024;gene6877;gene7007;pA_gene0085	ko00051;ko00051;ko00051;ko00051;ko00051;ko00051;ko00051;ko00051;ko00051;ko00051;ko00051;ko00051;ko00051;ko00051;ko00051;ko00051;ko00051;ko00051;ko00051;ko00051;ko00051;ko00051;ko00051;ko00051;ko00051;ko00051;ko00051;ko00051;ko00051;ko00051	K01624;K00966;K01840;K01809;K02770;K01808;K19270;K21071;K00847;K01803;K01628;K07046;K00064;K18334;K16881;K21071;K00064;K07046;K18334;K01805;K00066;K00847;K01808;K01711;K02377;K19270;K01218;K02446;K01840;K19270
Metabolism	Metabolism of terpenoids and polyketides	Terpenoid backbone biosynthesis	26	gene0263;gene0264;gene0549;gene0620;gene1156;gene1292;gene1607;gene2698;gene2831;gene4112;gene4113;gene4114;gene4283;gene5240;gene5506;gene5507;gene5511;gene5523;gene5546;gene5990;gene6271;gene6273;gene6536;gene6688;gene6871;gene6902	ko00900;ko00900;ko00900;ko00900;ko00900;ko00900;ko00900;ko00900;ko00900;ko00900;ko00900;ko00900;ko00900;ko00900;ko00900;ko00900;ko00900;ko00900;ko00900;ko00900;ko00900;ko00900;ko00900;ko00900;ko00900;ko00900	K00991;K01770;K00919;K00626;K00806;K00626;K00626;K00626;K00626;K01662;K03526;K13787;K13787;K13787;K01662;K03526;K13787;K01823;K00626;K01662;K03526;K00099;K00626;K13787;K03527;K12503
Metabolism	Biosynthesis of other secondary metabolites	Penicillin and cephalosporin biosynthesis	7	gene0513;gene4539;gene5245;gene5289;gene5537;gene5870;gene6881	ko00311;ko00311;ko00311;ko00311;ko00311;ko00311;ko00311	K01434;K17836;K04127;K17836;K00273;K00273;K01434
Metabolism	Energy metabolism	Photosynthesis	6	gene6557;gene6558;gene6560;gene6562;gene6563;gene6564	ko00195;ko00195;ko00195;ko00195;ko00195;ko00195	K02114;K02112;K02111;K02109;K02110;K02108
Cellular Processes	Cell growth and death	Ferroptosis	10	gene0485;gene1123;gene1483;gene1963;gene2691;gene3643;gene4440;gene5590;gene5630;gene7327	ko04216;ko04216;ko04216;ko04216;ko04216;ko04216;ko04216;ko04216;ko04216;ko04216	K01897;K01897;K01897;K01897;K01897;K01897;K01897;K01897;K01897;K01897
Organismal Systems	Environmental adaptation	Thermogenesis	12	gene0485;gene1123;gene1483;gene1710;gene1713;gene1963;gene2691;gene3643;gene4440;gene5590;gene5630;gene7327	ko04714;ko04714;ko04714;ko04714;ko04714;ko04714;ko04714;ko04714;ko04714;ko04714;ko04714;ko04714	K01897;K01897;K01897;K02257;K02259;K01897;K01897;K01897;K01897;K01897;K01897;K01897
Human Diseases	Cardiovascular disease	Lipid and atherosclerosis	2	gene0307;gene5129	ko05417;ko05417	K04077;K04079
Organismal Systems	Endocrine system	Thyroid hormone signaling pathway	4	gene2736;gene3658;gene5615;gene6442	ko04919;ko04919;ko04919;ko04919	K01114;K01114;K01114;K01114
Metabolism	Xenobiotics biodegradation and metabolism	Aminobenzoate degradation	16	gene0361;gene1613;gene2343;gene2695;gene2788;gene3401;gene4532;gene4906;gene4912;gene5085;gene5369;gene6016;gene6021;gene6041;gene6344;gene7340	ko00627;ko00627;ko00627;ko00627;ko00627;ko00627;ko00627;ko00627;ko00627;ko00627;ko00627;ko00627;ko00627;ko00627;ko00627;ko00627	K01692;K01692;K01692;K01692;K08295;K01426;K01426;K01426;K08295;K01426;K00141;K08295;K09461;K01692;K01512;K03186
Metabolism	Xenobiotics biodegradation and metabolism	Naphthalene degradation	3	gene1329;gene1948;gene4289	ko00626;ko00626;ko00626	K00121;K00121;K13953
Metabolism	Glycan biosynthesis and metabolism	Glycosaminoglycan degradation	7	gene0758;gene0903;gene0928;gene1021;gene2966;gene6706;gene7050	ko00531;ko00531;ko00531;ko00531;ko00531;ko00531;ko00531	K12373;K12373;K01207;K01197;K12373;K01207;K12373
Metabolism	Carbohydrate metabolism	Butanoate metabolism	53	gene0049;gene0361;gene0499;gene0620;gene0912;gene0921;gene1162;gene1163;gene1292;gene1607;gene1612;gene1613;gene2074;gene2290;gene2343;gene2548;gene2695;gene2698;gene2819;gene2831;gene2901;gene3472;gene3589;gene4227;gene4343;gene4562;gene5339;gene5394;gene5395;gene5396;gene5545;gene5546;gene5610;gene5611;gene5700;gene5702;gene5727;gene6041;gene6278;gene6424;gene6425;gene6536;gene6550;gene6845;gen…	ko00650;ko00650;ko00650;ko00650;ko00650;ko00650;ko00650;ko00650;ko00650;ko00650;ko00650;ko00650;ko00650;ko00650;ko00650;ko00650;ko00650;ko00650;ko00650;ko00650;ko00650;ko00650;ko00650;ko00650;ko00650;ko00650;ko00650;ko00650;ko00650;ko00650;ko00650;ko00650;ko00650;ko00650;ko00650;ko00650;ko00650;ko00650;ko00650;ko00650;ko00650;ko00650;ko00650;ko00650;ko00650;ko00650;ko00650;ko00650;ko00650;ko00650…	K00074;K01692;K00656;K00626;K01640;K01652;K00175;K00174;K00626;K00626;K01039;K01692;K00074;K01907;K01692;K00019;K01692;K00626;K18009;K00626;K01799;K01652;K00004;K01907;K01652;K00209;K00074;K00240;K00239;K00241;K01782;K00626;K01040;K01039;K00074;K17829;K00823;K01692;K07250;K01653;K01652;K00626;K00074;K00239;K00240;K00241;K00242;K00239;K00240;K00135;K00174;K00175;K01580
Metabolism	Carbohydrate metabolism	Glyoxylate and dicarboxylate metabolism	63	gene0121;gene0324;gene0358;gene0364;gene0377;gene0620;gene0786;gene0840;gene0913;gene0938;gene1164;gene1292;gene1336;gene1411;gene1417;gene1433;gene1607;gene2053;gene2205;gene2310;gene2671;gene2672;gene2698;gene2831;gene2832;gene2871;gene2914;gene2929;gene2930;gene3055;gene3056;gene3165;gene3681;gene3749;gene5338;gene5546;gene5703;gene5709;gene5783;gene5798;gene5799;gene5800;gene5808;gene5811;gen…	ko00630;ko00630;ko00630;ko00630;ko00630;ko00630;ko00630;ko00630;ko00630;ko00630;ko00630;ko00630;ko00630;ko00630;ko00630;ko00630;ko00630;ko00630;ko00630;ko00630;ko00630;ko00630;ko00630;ko00630;ko00630;ko00630;ko00630;ko00630;ko00630;ko00630;ko00630;ko00630;ko00630;ko00630;ko00630;ko00630;ko00630;ko00630;ko00630;ko00630;ko00630;ko00630;ko00630;ko00630;ko00630;ko00630;ko00630;ko00630;ko00630;ko00630…	K05606;K01091;K01965;K01647;K01433;K00626;K00104;K01091;K11263;K01647;K11263;K00626;K01625;K01915;K01915;K00382;K00626;K01915;K01915;K00281;K01847;K01847;K00626;K00626;K01895;K14446;K02437;K00124;K00123;K01647;K01647;K14446;K03781;K01915;K01637;K00626;K14447;K00865;K01638;K01816;K00042;K03781;K01608;K01895;K00382;K01915;K00605;K02437;K00600;K01848;K00626;K05606;K00600;K01616;K03781;K03781;K01966;…
Metabolism	Energy metabolism	Carbon fixation pathways in prokaryotes	44	gene0121;gene0564;gene0620;gene1162;gene1163;gene1186;gene1292;gene1513;gene1607;gene2671;gene2672;gene2698;gene2831;gene2832;gene4614;gene4615;gene5394;gene5395;gene5396;gene5484;gene5546;gene5811;gene6510;gene6511;gene6523;gene6536;gene6537;gene6845;gene6846;gene6880;gene6883;gene7045;gene7052;gene7053;gene7054;gene7055;gene7086;gene7089;gene7097;gene7098;gene7104;gene7277;gene7278;gene7524	ko00720;ko00720;ko00720;ko00720;ko00720;ko00720;ko00720;ko00720;ko00720;ko00720;ko00720;ko00720;ko00720;ko00720;ko00720;ko00720;ko00720;ko00720;ko00720;ko00720;ko00720;ko00720;ko00720;ko00720;ko00720;ko00720;ko00720;ko00720;ko00720;ko00720;ko00720;ko00720;ko00720;ko00720;ko00720;ko00720;ko00720;ko00720;ko00720;ko00720;ko00720;ko00720;ko00720;ko00720	K05606;K01595;K00626;K00175;K00174;K01006;K00626;K00297;K00626;K01847;K01847;K00626;K00626;K01895;K01006;K01006;K00240;K00239;K00241;K00031;K00626;K01895;K13788;K00925;K01848;K00626;K05606;K00239;K00240;K01676;K01679;K01848;K00241;K00242;K00239;K00240;K00024;K01491;K01902;K01903;K01849;K00174;K00175;K01895
Metabolism	Amino acid metabolism	Lysine biosynthesis	20	gene0158;gene0195;gene0196;gene0452;gene0625;gene1033;gene1530;gene1531;gene1729;gene1730;gene2089;gene2592;gene5815;gene6182;gene6229;gene6234;gene6577;gene6578;gene6808;gene7380	ko00300;ko00300;ko00300;ko00300;ko00300;ko00300;ko00300;ko00300;ko00300;ko00300;ko00300;ko00300;ko00300;ko00300;ko00300;ko00300;ko00300;ko00300;ko00300;ko00300	K14267;K00928;K00133;K00928;K01586;K00133;K01928;K01929;K00674;K01714;K00821;K01714;K01586;K01778;K01714;K00215;K00003;K01586;K01439;K05825
Metabolism	Metabolism of terpenoids and polyketides	Nonribosomal peptide structures	1	gene0632	ko01054	K01779
Metabolism	Carbohydrate metabolism	Citrate cycle (TCA cycle)	30	gene0364;gene0938;gene1162;gene1163;gene1246;gene1430;gene1432;gene1433;gene3055;gene3056;gene5394;gene5395;gene5396;gene5484;gene5940;gene6638;gene6845;gene6846;gene6880;gene6883;gene6955;gene7052;gene7053;gene7054;gene7055;gene7086;gene7097;gene7098;gene7277;gene7278	ko00020;ko00020;ko00020;ko00020;ko00020;ko00020;ko00020;ko00020;ko00020;ko00020;ko00020;ko00020;ko00020;ko00020;ko00020;ko00020;ko00020;ko00020;ko00020;ko00020;ko00020;ko00020;ko00020;ko00020;ko00020;ko00020;ko00020;ko00020;ko00020;ko00020	K01647;K01647;K00175;K00174;K00163;K00163;K00627;K00382;K01647;K01647;K00240;K00239;K00241;K00031;K00382;K01616;K00239;K00240;K01676;K01679;K01596;K00241;K00242;K00239;K00240;K00024;K01902;K01903;K00174;K00175
Metabolism	Metabolism of terpenoids and polyketides	Geraniol degradation	10	gene0361;gene0912;gene1317;gene1613;gene2343;gene2695;gene5545;gene5734;gene5984;gene6041	ko00281;ko00281;ko00281;ko00281;ko00281;ko00281;ko00281;ko00281;ko00281;ko00281	K01692;K01640;K00632;K01692;K01692;K01692;K01782;K00632;K00632;K01692
Metabolism	Biosynthesis of other secondary metabolites	Biosynthesis of various secondary metabolites - part 3	5	gene0448;gene0450;gene0451;gene0906;gene1635	ko00997;ko00997;ko00997;ko00997;ko00997	K20204;K17835;K18287;K03897;K03897
Metabolism	Biosynthesis of other secondary metabolites	Biosynthesis of various secondary metabolites - part 2	9	gene1235;gene2868;gene3315;gene3318;gene3632;gene4339;gene4942;gene5481;gene5565	ko00998;ko00998;ko00998;ko00998;ko00998;ko00998;ko00998;ko00998;ko00998	K02078;K02078;K02078;K02078;K02078;K02078;K02078;K02078;K02078
Human Diseases	Neurodegenerative disease	Alzheimer disease	4	gene1698;gene4605;gene5248;pA_gene0044	ko05010;ko05010;ko05010;ko05010	K00134;K00134;K00134;K00134
Metabolism	Biosynthesis of other secondary metabolites	Neomycin, kanamycin and gentamicin biosynthesis	4	gene0298;gene1488;gene2504;gene5756	ko00524;ko00524;ko00524;ko00524	K25026;K25026;K25026;K25026
Environmental Information Processing	Signal transduction	Phosphatidylinositol signaling system	4	gene2606;gene4266;gene6066;gene6305	ko04070;ko04070;ko04070;ko04070	K01092;K01092;K01092;K00981
Metabolism	Energy metabolism	Carbon fixation in photosynthetic organisms	20	gene0165;gene0564;gene1050;gene1186;gene1698;gene1699;gene1700;gene1709;gene2202;gene2953;gene4605;gene4614;gene4615;gene4619;gene4677;gene5248;gene5824;gene6877;gene7086;pA_gene0044	ko00710;ko00710;ko00710;ko00710;ko00710;ko00710;ko00710;ko00710;ko00710;ko00710;ko00710;ko00710;ko00710;ko00710;ko00710;ko00710;ko00710;ko00710;ko00710;ko00710	K01624;K01595;K01808;K01006;K00134;K00927;K01803;K00615;K01783;K00615;K00134;K01006;K01006;K01621;K01808;K00134;K01621;K02446;K00024;K00134
Metabolism	Metabolism of cofactors and vitamins	Folate biosynthesis	20	gene0023;gene0056;gene0203;gene0516;gene0517;gene1070;gene1550;gene1814;gene2122;gene2227;gene2384;gene3674;gene4292;gene5646;gene6739;gene6806;gene7457;gene7459;gene7460;gene7462	ko00790;ko00790;ko00790;ko00790;ko00790;ko00790;ko00790;ko00790;ko00790;ko00790;ko00790;ko00790;ko00790;ko00790;ko00790;ko00790;ko00790;ko00790;ko00790;ko00790	K01664;K03750;K01077;K03750;K03637;K11754;K01113;K03639;K01665;K14652;K01113;K00287;K11754;K01724;K03635;K00796;K00796;K01633;K00950;K01495
Metabolism	Biosynthesis of other secondary metabolites	Isoquinoline alkaloid biosynthesis	4	gene2677;gene4078;gene7242;pA_gene0094	ko00950;ko00950;ko00950;ko00950	K00505;K00276;K00812;K00505
Genetic Information Processing	Translation	Ribosome biogenesis in eukaryotes	2	gene0895;gene6349	ko03008;ko03008	K13288;K03685
Human Diseases	Infectious disease: bacterial	Epithelial cell signaling in Helicobacter pylori infection	3	gene2422;gene6402;gene6403	ko05120;ko05120;ko05120	K01428;K01428;K14048
Organismal Systems	Endocrine system	Glucagon signaling pathway	5	gene0256;gene1638;gene6487;gene6512;gene6955	ko04922;ko04922;ko04922;ko04922;ko04922	K01834;K00873;K00688;K00873;K01596
Metabolism	Biosynthesis of other secondary metabolites	Biosynthesis of various secondary metabolites - part 1	1	gene2715	ko00999	K17876
Environmental Information Processing	Signal transduction	HIF-1 signaling pathway	7	gene0604;gene1698;gene1699;gene3410;gene4605;gene5248;pA_gene0044	ko04066;ko04066;ko04066;ko04066;ko04066;ko04066;ko04066	K01689;K00134;K00927;K01689;K00134;K00134;K00134
Cellular Processes	Transport and catabolism	Peroxisome	22	gene0485;gene0912;gene1123;gene1483;gene1963;gene2691;gene3019;gene3643;gene3681;gene4440;gene5019;gene5484;gene5537;gene5548;gene5590;gene5630;gene5800;gene5870;gene6730;gene6755;gene6886;gene7327	ko04146;ko04146;ko04146;ko04146;ko04146;ko04146;ko04146;ko04146;ko04146;ko04146;ko04146;ko04146;ko04146;ko04146;ko04146;ko04146;ko04146;ko04146;ko04146;ko04146;ko04146;ko04146	K01897;K01640;K01897;K01897;K01897;K01897;K00803;K01897;K03781;K01897;K04565;K00031;K00273;K01796;K01897;K01897;K03781;K00273;K03781;K03426;K03781;K01897
Metabolism	Metabolism of other amino acids	beta-Alanine metabolism	24	gene0184;gene0361;gene0948;gene1300;gene1613;gene1946;gene1947;gene2343;gene2695;gene3640;gene3641;gene4078;gene5117;gene5427;gene5545;gene5726;gene5727;gene5728;gene6041;gene6278;gene7012;gene7437;gene7472;gene7474	ko00410;ko00410;ko00410;ko00410;ko00410;ko00410;ko00410;ko00410;ko00410;ko00410;ko00410;ko00410;ko00410;ko00410;ko00410;ko00410;ko00410;ko00410;ko00410;ko00410;ko00410;ko00410;ko00410;ko00410	K15372;K01692;K00140;K00128;K01692;K00128;K00128;K01692;K01692;K00128;K01579;K00276;K00128;K01579;K01782;K01464;K00823;K01431;K01692;K07250;K00128;K01918;K01580;K00128
Environmental Information Processing	Signaling molecules and interaction	Neuroactive ligand-receptor interaction	1	gene3007	ko04080	K05770
Organismal Systems	Digestive system	Carbohydrate digestion and absorption	1	gene2595	ko04973	K01176
Metabolism	Metabolism of terpenoids and polyketides	Biosynthesis of siderophore group nonribosomal peptides	1	gene4574	ko01053	K02363
Metabolism	Metabolism of cofactors and vitamins	Lipoic acid metabolism	3	gene1421;gene1422;gene5723	ko00785;ko00785;ko00785	K03644;K03801;K03800
Metabolism	Amino acid metabolism	Valine, leucine and isoleucine biosynthesis	19	gene0921;gene1153;gene1671;gene2123;gene3085;gene3472;gene4343;gene4790;gene6369;gene6370;gene6398;gene6405;gene6406;gene6423;gene6424;gene6425;gene6947;gene6970;gene7408	ko00290;ko00290;ko00290;ko00290;ko00290;ko00290;ko00290;ko00290;ko00290;ko00290;ko00290;ko00290;ko00290;ko00290;ko00290;ko00290;ko00290;ko00290;ko00290	K01652;K01649;K14260;K00826;K00826;K01652;K01652;K01754;K01704;K01703;K01649;K00826;K00052;K00053;K01653;K01652;K14260;K01754;K01687
Metabolism	Metabolism of terpenoids and polyketides	Zeatin biosynthesis	1	gene6184	ko00908	K00791
Metabolism	Global and overview maps	Biosynthesis of secondary metabolites	508	gene0003;gene0052;gene0053;gene0054;gene0066;gene0067;gene0068;gene0154;gene0163;gene0165;gene0195;gene0196;gene0256;gene0263;gene0264;gene0298;gene0301;gene0302;gene0304;gene0324;gene0327;gene0328;gene0350;gene0358;gene0361;gene0364;gene0447;gene0448;gene0450;gene0451;gene0452;gene0475;gene0476;gene0482;gene0483;gene0484;gene0515;gene0549;gene0567;gene0604;gene0620;gene0621;gene0625;gene0630;gen…	ko01110;ko01110;ko01110;ko01110;ko01110;ko01110;ko01110;ko01110;ko01110;ko01110;ko01110;ko01110;ko01110;ko01110;ko01110;ko01110;ko01110;ko01110;ko01110;ko01110;ko01110;ko01110;ko01110;ko01110;ko01110;ko01110;ko01110;ko01110;ko01110;ko01110;ko01110;ko01110;ko01110;ko01110;ko01110;ko01110;ko01110;ko01110;ko01110;ko01110;ko01110;ko01110;ko01110;ko01110;ko01110;ko01110;ko01110;ko01110;ko01110;ko01110…	K00033;K00166;K00167;K09699;K00166;K00167;K09699;K23825;K01785;K01624;K00928;K00133;K01834;K00991;K01770;K25026;K01087;K00697;K01733;K01091;K11785;K11783;K00831;K01965;K01692;K01647;K01953;K20204;K17835;K18287;K00928;K20260;K06998;K01626;K20261;K13063;K00963;K00919;K00948;K01689;K00626;K01697;K01586;K19267;K01589;K01588;K00966;K01840;K01809;K01790;K00067;K01710;K00973;K01719;K00104;K01091;K05350;…
Organismal Systems	Endocrine system	Progesterone-mediated oocyte maturation	1	gene5129	ko04914	K04079
Metabolism	Biosynthesis of other secondary metabolites	Novobiocin biosynthesis	5	gene1565;gene1766;gene1882;gene7242;gene7729	ko00401;ko00401;ko00401;ko00401;ko00401	K00817;K00817;K04517;K00812;K00817
Cellular Processes	Cellular community - prokaryotes	Quorum sensing	107	gene0290;gene0379;gene0475;gene0476;gene0482;gene0483;gene0484;gene0485;gene0593;gene0704;gene0832;gene1123;gene1198;gene1483;gene1497;gene1500;gene1574;gene1620;gene1621;gene1622;gene1623;gene1642;gene1643;gene1644;gene1645;gene1646;gene1701;gene1889;gene1916;gene1917;gene1918;gene1919;gene1963;gene2017;gene2018;gene2152;gene2224;gene2335;gene2691;gene2736;gene2833;gene3213;gene3339;gene3643;gen…	ko02024;ko02024;ko02024;ko02024;ko02024;ko02024;ko02024;ko02024;ko02024;ko02024;ko02024;ko02024;ko02024;ko02024;ko02024;ko02024;ko02024;ko02024;ko02024;ko02024;ko02024;ko02024;ko02024;ko02024;ko02024;ko02024;ko02024;ko02024;ko02024;ko02024;ko02024;ko02024;ko02024;ko02024;ko02024;ko02024;ko02024;ko02024;ko02024;ko02024;ko02024;ko02024;ko02024;ko02024;ko02024;ko02024;ko02024;ko02024;ko02024;ko02024…	K20273;K01999;K20260;K06998;K01626;K20261;K13063;K01897;K20276;K03070;K03217;K01897;K20273;K01897;K13063;K01626;K01657;K02052;K02053;K02054;K02055;K01996;K01995;K01998;K01997;K01999;K03075;K01996;K02034;K02035;K02033;K02031;K01897;K02035;K02035;K03210;K11752;K02035;K01897;K01114;K13075;K20262;K20331;K01897;K15580;K01114;K20273;K20273;K06998;K20273;K01897;K20484;K20483;K02035;K02034;K02033;K02031;…
Metabolism	Glycan biosynthesis and metabolism	O-Antigen repeat unit biosynthesis	1	gene6566	ko00542	K02851
Metabolism	Xenobiotics biodegradation and metabolism	Chlorocyclohexane and chlorobenzene degradation	2	gene2905;gene5614	ko00361;ko00361	K01061;K01561
Metabolism	Lipid metabolism	Arachidonic acid metabolism	1	gene2437	ko00590	K00432
Metabolism	Biosynthesis of other secondary metabolites	Prodigiosin biosynthesis	17	gene1237;gene1605;gene1797;gene1821;gene2333;gene2779;gene3030;gene3187;gene3335;gene3391;gene3633;gene3634;gene4833;gene4944;gene5478;gene6211;pA_gene0007	ko00333;ko00333;ko00333;ko00333;ko00333;ko00333;ko00333;ko00333;ko00333;ko00333;ko00333;ko00333;ko00333;ko00333;ko00333;ko00333;ko00333	K00645;K00059;K00059;K00059;K00059;K00059;K00059;K00059;K00059;K00059;K00059;K00645;K00059;K00059;K00059;K00059;K00059
Metabolism	Lipid metabolism	Sphingolipid metabolism	7	gene1637;gene2479;gene2723;gene2735;gene3183;gene5501;gene5660	ko00600;ko00600;ko00600;ko00600;ko00600;ko00600;ko00600	K07407;K12349;K07406;K01186;K07407;K07407;K01190
Metabolism	Carbohydrate metabolism	Amino sugar and nucleotide sugar metabolism	61	gene0297;gene0298;gene0308;gene0515;gene0554;gene0555;gene0556;gene0568;gene0655;gene0667;gene0677;gene0680;gene0755;gene0758;gene0803;gene0804;gene0871;gene0900;gene0903;gene0928;gene1091;gene1488;gene1595;gene1688;gene1703;gene2223;gene2242;gene2295;gene2300;gene2504;gene2615;gene2966;gene3133;gene3580;gene4430;gene4431;gene4450;gene4461;gene4507;gene4934;gene4952;gene5058;gene5174;gene5381;gen…	ko00520;ko00520;ko00520;ko00520;ko00520;ko00520;ko00520;ko00520;ko00520;ko00520;ko00520;ko00520;ko00520;ko00520;ko00520;ko00520;ko00520;ko00520;ko00520;ko00520;ko00520;ko00520;ko00520;ko00520;ko00520;ko00520;ko00520;ko00520;ko00520;ko00520;ko00520;ko00520;ko00520;ko00520;ko00520;ko00520;ko00520;ko00520;ko00520;ko00520;ko00520;ko00520;ko00520;ko00520;ko00520;ko00520;ko00520;ko00520;ko00520;ko00520…	K01443;K25026;K07106;K00963;K00965;K01784;K00849;K04042;K00012;K00966;K01840;K01809;K00790;K12373;K02804;K02804;K01183;K00820;K12373;K01207;K01784;K25026;K01791;K00847;K01810;K01183;K01183;K02777;K16881;K25026;K01183;K12373;K01209;K20844;K08678;K02472;K00066;K00978;K00847;K01711;K02377;K00820;K01183;K15855;K01791;K01183;K25026;K01233;K00790;K01183;K00820;K02564;K01207;K00886;K01840;K01654;K12373;…
Metabolism	Metabolism of cofactors and vitamins	Thiamine metabolism	16	gene0203;gene1459;gene1507;gene1509;gene1512;gene2551;gene4112;gene5506;gene5896;gene5990;gene6358;gene6359;gene6450;gene6725;gene7197;gene7733	ko00730;ko00730;ko00730;ko00730;ko00730;ko00730;ko00730;ko00730;ko00730;ko00730;ko00730;ko00730;ko00730;ko00730;ko00730;ko00730	K01077;K04487;K03149;K03153;K00788;K06949;K01662;K01662;K06949;K01662;K00941;K00946;K04487;K06949;K00939;K03147
Organismal Systems	Nervous system	Glutamatergic synapse	7	gene1411;gene1417;gene2053;gene2205;gene3749;gene6137;gene7319	ko04724;ko04724;ko04724;ko04724;ko04724;ko04724;ko04724	K01915;K01915;K01915;K01915;K01915;K01915;K01425
Human Diseases	Drug resistance: antimicrobial	beta-Lactam resistance	18	gene0928;gene1076;gene1529;gene3655;gene4539;gene5289;gene6706;gene6830;gene6831;gene6832;gene6833;gene6834;gene6836;gene6837;gene6838;gene6839;gene6840;gene6887	ko01501;ko01501;ko01501;ko01501;ko01501;ko01501;ko01501;ko01501;ko01501;ko01501;ko01501;ko01501;ko01501;ko01501;ko01501;ko01501;ko01501;ko01501	K01207;K05515;K03587;K15580;K17836;K17836;K01207;K10823;K15583;K15582;K15581;K15580;K10823;K15583;K15582;K15581;K15580;K05366
Metabolism	Metabolism of terpenoids and polyketides	Limonene and pinene degradation	13	gene0361;gene1300;gene1613;gene1946;gene1947;gene2343;gene2695;gene3640;gene5117;gene5545;gene6041;gene7012;gene7474	ko00903;ko00903;ko00903;ko00903;ko00903;ko00903;ko00903;ko00903;ko00903;ko00903;ko00903;ko00903;ko00903	K01692;K00128;K01692;K00128;K00128;K01692;K01692;K00128;K00128;K01782;K01692;K00128;K00128
Human Diseases	Endocrine and metabolic disease	Type II diabetes mellitus	2	gene1638;gene6512	ko04930;ko04930	K00873;K00873
Cellular Processes	Transport and catabolism	Autophagy - yeast	1	gene2252	ko04138	K06902
Metabolism	Lipid metabolism	Steroid hormone biosynthesis	1	gene0425	ko00140	K00038
Cellular Processes	Cellular community - prokaryotes	Biofilm formation - Escherichia coli	7	gene2295;gene5023;gene6312;gene6487;gene6896;gene7225;gene7532	ko02026;ko02026;ko02026;ko02026;ko02026;ko02026;ko02026	K02777;K00694;K02405;K00688;K04761;K10914;K10914
Metabolism	Lipid metabolism	alpha-Linolenic acid metabolism	3	gene1317;gene5734;gene5984	ko00592;ko00592;ko00592	K00632;K00632;K00632
Human Diseases	Cancer: overview	Pathways in cancer	3	gene4988;gene5129;gene6883	ko05200;ko05200;ko05200	K00355;K04079;K01679
Metabolism	Xenobiotics biodegradation and metabolism	Metabolism of xenobiotics by cytochrome P450	3	gene1329;gene1948;gene4289	ko00980;ko00980;ko00980	K00121;K00121;K13953
Human Diseases	Cardiovascular disease	Diabetic cardiomyopathy	8	gene0900;gene1698;gene1707;gene4605;gene5058;gene5248;gene6704;pA_gene0044	ko05415;ko05415;ko05415;ko05415;ko05415;ko05415;ko05415;ko05415	K00820;K00134;K00036;K00134;K00820;K00134;K00820;K00134
Human Diseases	Cancer: overview	MicroRNAs in cancer	2	gene4838;gene7319	ko05206;ko05206	K00558;K01425
Organismal Systems	Endocrine system	Estrogen signaling pathway	1	gene5129	ko04915	K04079
Human Diseases	Drug resistance: antimicrobial	Vancomycin resistance	12	gene1368;gene1531;gene1532;gene1535;gene2287;gene3918;gene3980;gene4890;gene6362;gene6520;gene7177;pA_gene0084	ko01502;ko01502;ko01502;ko01502;ko01502;ko01502;ko01502;ko01502;ko01502;ko01502;ko01502;ko01502	K18353;K01929;K01000;K02563;K08641;K18353;K01921;K02563;K01921;K02563;K01775;K08641
Human Diseases	Cancer: overview	Chemical carcinogenesis - receptor activation	1	gene5129	ko05207	K04079
Metabolism	Glycan biosynthesis and metabolism	Peptidoglycan biosynthesis	31	gene0027;gene0442;gene0755;gene1076;gene1156;gene1529;gene1530;gene1531;gene1532;gene1533;gene1535;gene1745;gene2344;gene2432;gene2433;gene3917;gene3980;gene4890;gene5291;gene5292;gene5954;gene6004;gene6362;gene6513;gene6520;gene6614;gene6887;gene7061;gene7245;gene7467;gene7553	ko00550;ko00550;ko00550;ko00550;ko00550;ko00550;ko00550;ko00550;ko00550;ko00550;ko00550;ko00550;ko00550;ko00550;ko00550;ko00550;ko00550;ko00550;ko00550;ko00550;ko00550;ko00550;ko00550;ko00550;ko00550;ko00550;ko00550;ko00550;ko00550;ko00550;ko00550	K05364;K07258;K00790;K05515;K00806;K03587;K01928;K01929;K01000;K01925;K02563;K05364;K06153;K07009;K23393;K07258;K01921;K02563;K05364;K07258;K01924;K00790;K01921;K07258;K02563;K05364;K05366;K07258;K00075;K07259;K19302
Metabolism	Xenobiotics biodegradation and metabolism	Steroid degradation	6	gene0396;gene0415;gene1291;gene1482;gene3035;gene7125	ko00984;ko00984;ko00984;ko00984;ko00984;ko00984	K16048;K18687;K15981;K03333;K03333;K03333
Metabolism	Glycan biosynthesis and metabolism	Lipoarabinomannan (LAM) biosynthesis	7	gene0320;gene1109;gene1481;gene2143;gene2144;gene2261;gene6243	ko00571;ko00571;ko00571;ko00571;ko00571;ko00571;ko00571	K13671;K13671;K13668;K22311;K08256;K14335;K23176
Human Diseases	Cancer: overview	Viral carcinogenesis	2	gene1638;gene6512	ko05203;ko05203	K00873;K00873
Human Diseases	Infectious disease: viral	Human papillomavirus infection	2	gene1638;gene6512	ko05165;ko05165	K00873;K00873
Metabolism	Amino acid metabolism	Cysteine and methionine metabolism	36	gene0161;gene0195;gene0196;gene0224;gene0350;gene0452;gene0509;gene0621;gene0683;gene0695;gene1033;gene2015;gene2123;gene2196;gene2382;gene2533;gene2676;gene2970;gene3085;gene3388;gene4335;gene4838;gene4994;gene5384;gene6028;gene6037;gene6072;gene6405;gene6422;gene6468;gene6577;gene6693;gene6974;gene7086;gene7242;gene7740	ko00270;ko00270;ko00270;ko00270;ko00270;ko00270;ko00270;ko00270;ko00270;ko00270;ko00270;ko00270;ko00270;ko00270;ko00270;ko00270;ko00270;ko00270;ko00270;ko00270;ko00270;ko00270;ko00270;ko00270;ko00270;ko00270;ko00270;ko00270;ko00270;ko00270;ko00270;ko00270;ko00270;ko00270;ko00270;ko00270	K00797;K00928;K00133;K01011;K00831;K00928;K00772;K01697;K01251;K08963;K00133;K00548;K00826;K00789;K01761;K01738;K01697;K01243;K00826;K14155;K22847;K00558;K12960;K01919;K00547;K00549;K01011;K00826;K00058;K01752;K00003;K01505;K01739;K00024;K00812;K01758
Organismal Systems	Endocrine system	PPAR signaling pathway	21	gene0485;gene0563;gene0918;gene1123;gene1483;gene1963;gene1965;gene2012;gene2283;gene2691;gene3210;gene3230;gene3643;gene4273;gene4440;gene5590;gene5630;gene5860;gene6015;gene6955;gene7327	ko03320;ko03320;ko03320;ko03320;ko03320;ko03320;ko03320;ko03320;ko03320;ko03320;ko03320;ko03320;ko03320;ko03320;ko03320;ko03320;ko03320;ko03320;ko03320;ko03320;ko03320	K01897;K00507;K00249;K01897;K01897;K01897;K00249;K00864;K00864;K01897;K00249;K00507;K01897;K00249;K01897;K01897;K01897;K00249;K00249;K01596;K01897
Environmental Information Processing	Signal transduction	Two-component system	87	gene0001;gene0065;gene0203;gene0259;gene0260;gene0620;gene0696;gene0697;gene0753;gene0848;gene1292;gene1320;gene1326;gene1368;gene1403;gene1411;gene1417;gene1446;gene1550;gene1584;gene1595;gene1607;gene1713;gene2053;gene2205;gene2218;gene2287;gene2384;gene2698;gene2831;gene3091;gene3092;gene3350;gene3524;gene3574;gene3749;gene3918;gene4431;gene4450;gene4473;gene4474;gene4584;gene4889;gene4976;gen…	ko02020;ko02020;ko02020;ko02020;ko02020;ko02020;ko02020;ko02020;ko02020;ko02020;ko02020;ko02020;ko02020;ko02020;ko02020;ko02020;ko02020;ko02020;ko02020;ko02020;ko02020;ko02020;ko02020;ko02020;ko02020;ko02020;ko02020;ko02020;ko02020;ko02020;ko02020;ko02020;ko02020;ko02020;ko02020;ko02020;ko02020;ko02020;ko02020;ko02020;ko02020;ko02020;ko02020;ko02020;ko02020;ko02020;ko02020;ko02020;ko02020;ko02020…	K02313;K07695;K01077;K07768;K07776;K00626;K07670;K07654;K00027;K01179;K00626;K07778;K07693;K18353;K01104;K01915;K01915;K08372;K01113;K01644;K01791;K00626;K02259;K01915;K01915;K01179;K08641;K01113;K00626;K00626;K19668;K01179;K01179;K01104;K01179;K01915;K18353;K02472;K00066;K20484;K20483;K07695;K01104;K07655;K01104;K01104;K01791;K00626;K01644;K07654;K07667;K07646;K01915;K02405;K00990;K04751;K11103;…
Metabolism	Carbohydrate metabolism	Pyruvate metabolism	63	gene0398;gene0499;gene0564;gene0620;gene0753;gene0913;gene1037;gene1153;gene1162;gene1163;gene1164;gene1186;gene1246;gene1292;gene1300;gene1329;gene1430;gene1432;gene1433;gene1496;gene1607;gene1638;gene1946;gene1947;gene1948;gene2162;gene2445;gene2698;gene2831;gene2832;gene2846;gene3640;gene3825;gene3826;gene4289;gene4614;gene4615;gene5117;gene5214;gene5546;gene5783;gene5811;gene5887;gene5940;gen…	ko00620;ko00620;ko00620;ko00620;ko00620;ko00620;ko00620;ko00620;ko00620;ko00620;ko00620;ko00620;ko00620;ko00620;ko00620;ko00620;ko00620;ko00620;ko00620;ko00620;ko00620;ko00620;ko00620;ko00620;ko00620;ko00620;ko00620;ko00620;ko00620;ko00620;ko00620;ko00620;ko00620;ko00620;ko00620;ko00620;ko00620;ko00620;ko00620;ko00620;ko00620;ko00620;ko00620;ko00620;ko00620;ko00620;ko00620;ko00620;ko00620;ko00620…	K24012;K00656;K01595;K00626;K00027;K11263;K01759;K01649;K00175;K00174;K11263;K01006;K00163;K00626;K00128;K00121;K00163;K00627;K00382;K03778;K00626;K00873;K00128;K00128;K00121;K01069;K18930;K00626;K00626;K01895;K00467;K00128;K01069;K01069;K13953;K01006;K01006;K00128;K00138;K00626;K01638;K01895;K00156;K00382;K01512;K01649;K13788;K00925;K00873;K00626;K01069;K00027;K01676;K01679;K01596;K13979;K11263;…
Organismal Systems	Digestive system	Pancreatic secretion	1	gene2595	ko04972	K01176
Metabolism	Metabolism of other amino acids	Cyanoamino acid metabolism	10	gene0889;gene2352;gene2650;gene4411;gene5722;gene5738;gene5944;gene6467;gene6567;gene7073	ko00460;ko00460;ko00460;ko00460;ko00460;ko00460;ko00460;ko00460;ko00460;ko00460	K05350;K05349;K05350;K05349;K00681;K00681;K05350;K00600;K00600;K00600
Human Diseases	Drug resistance: antineoplastic	Antifolate resistance	6	gene3673;gene3674;gene6467;gene6567;gene7073;gene7091	ko01523;ko01523;ko01523;ko01523;ko01523;ko01523	K00560;K00287;K00600;K00600;K00600;K00602
Metabolism	Xenobiotics biodegradation and metabolism	Atrazine degradation	5	gene2420;gene2421;gene2422;gene6402;gene6403	ko00791;ko00791;ko00791;ko00791;ko00791	K01430;K01429;K01428;K01428;K14048
Metabolism	Xenobiotics biodegradation and metabolism	Xylene degradation	2	gene5369;gene5812	ko00622;ko00622	K00141;K01821
Genetic Information Processing	Replication and repair	DNA replication	20	gene0002;gene0996;gene1120;gene1206;gene1261;gene1335;gene1554;gene1650;gene1801;gene2135;gene2206;gene3359;gene5933;gene6162;gene6444;gene7483;gene7502;gene7637;gene7751;gene7755	ko03030;ko03030;ko03030;ko03030;ko03030;ko03030;ko03030;ko03030;ko03030;ko03030;ko03030;ko03030;ko03030;ko03030;ko03030;ko03030;ko03030;ko03030;ko03030;ko03030	K02338;K03111;K02340;K02316;K02314;K22316;K02337;K02335;K02342;K02342;K10747;K02338;K02342;K03470;K01972;K02335;K02341;K02343;K02314;K03111
Human Diseases	Immune disease	Primary immunodeficiency	7	gene1137;gene2336;gene2477;gene2662;gene5686;gene7024;gene7243	ko05340;ko05340;ko05340;ko05340;ko05340;ko05340;ko05340	K01488;K03648;K03648;K01488;K01488;K01488;K01488
Metabolism	Biosynthesis of other secondary metabolites	Flavonoid biosynthesis	1	gene1257	ko00941	K00588
Cellular Processes	Cell growth and death	Necroptosis	10	gene0017;gene1411;gene1417;gene2053;gene2205;gene3749;gene5129;gene5470;gene6137;gene6487	ko04217;ko04217;ko04217;ko04217;ko04217;ko04217;ko04217;ko04217;ko04217;ko04217	K03767;K01915;K01915;K01915;K01915;K01915;K04079;K00261;K01915;K00688
Human Diseases	Cancer: specific types	Renal cell carcinoma	1	gene6883	ko05211	K01679
Metabolism	Biosynthesis of other secondary metabolites	Tropane, piperidine and pyridine alkaloid biosynthesis	5	gene1565;gene1766;gene4078;gene7242;gene7729	ko00960;ko00960;ko00960;ko00960;ko00960	K00817;K00817;K00276;K00812;K00817
Metabolism	Glycan biosynthesis and metabolism	O-Antigen nucleotide sugar biosynthesis	25	gene0515;gene0555;gene0568;gene0655;gene0677;gene0680;gene0720;gene0721;gene0722;gene0723;gene1091;gene1595;gene4431;gene4461;gene4468;gene4886;gene4934;gene4952;gene5532;gene7007;gene7038;gene7134;gene7393;pA_gene0016;pA_gene0019	ko00541;ko00541;ko00541;ko00541;ko00541;ko00541;ko00541;ko00541;ko00541;ko00541;ko00541;ko00541;ko00541;ko00541;ko00541;ko00541;ko00541;ko00541;ko00541;ko00541;ko00541;ko00541;ko00541;ko00541;ko00541	K00963;K01784;K04042;K00012;K01840;K01809;K01790;K00067;K01710;K00973;K01784;K01791;K02472;K00978;K01790;K01710;K01711;K02377;K01791;K01840;K01654;K13015;K01784;K00973;K01710
Genetic Information Processing	Folding, sorting and degradation	Protein processing in endoplasmic reticulum	3	gene0130;gene4617;gene5129	ko04141;ko04141;ko04141	K13993;K13993;K04079
Metabolism	Amino acid metabolism	Arginine biosynthesis	31	gene0709;gene1411;gene1417;gene1671;gene2053;gene2086;gene2087;gene2088;gene2089;gene2092;gene2093;gene2205;gene2420;gene2421;gene2422;gene3749;gene4080;gene5015;gene5468;gene5470;gene6024;gene6025;gene6137;gene6402;gene6403;gene6813;gene6947;gene7242;gene7319;gene7430;gene7624	ko00220;ko00220;ko00220;ko00220;ko00220;ko00220;ko00220;ko00220;ko00220;ko00220;ko00220;ko00220;ko00220;ko00220;ko00220;ko00220;ko00220;ko00220;ko00220;ko00220;ko00220;ko00220;ko00220;ko00220;ko00220;ko00220;ko00220;ko00220;ko00220;ko00220;ko00220	K15371;K01915;K01915;K14260;K01915;K00145;K00620;K00930;K00821;K01940;K01755;K01915;K01430;K01429;K01428;K01915;K00491;K01476;K00491;K00261;K00611;K01478;K01915;K01428;K14048;K22476;K14260;K00812;K01425;K00619;K23265
Organismal Systems	Endocrine system	Melanogenesis	2	gene2677;pA_gene0094	ko04916;ko04916	K00505;K00505
Metabolism	Xenobiotics biodegradation and metabolism	Fluorobenzoate degradation	1	gene2905	ko00364	K01061
Cellular Processes	Cell motility	Flagellar assembly	3	gene1207;gene6108;gene6312	ko02040;ko02040;ko02040	K03086;K03086;K02405
Organismal Systems	Digestive system	Salivary secretion	1	gene2595	ko04970	K01176
Metabolism	Amino acid metabolism	Phenylalanine metabolism	35	gene0040;gene0041;gene0042;gene0043;gene0044;gene0049;gene0361;gene0397;gene0784;gene1205;gene1510;gene1565;gene1613;gene1719;gene1766;gene2074;gene2343;gene2693;gene2695;gene3401;gene3462;gene4078;gene4228;gene4532;gene4906;gene5085;gene5247;gene5339;gene5700;gene6041;gene6196;gene6550;gene6803;gene7242;gene7729	ko00360;ko00360;ko00360;ko00360;ko00360;ko00360;ko00360;ko00360;ko00360;ko00360;ko00360;ko00360;ko00360;ko00360;ko00360;ko00360;ko00360;ko00360;ko00360;ko00360;ko00360;ko00360;ko00360;ko00360;ko00360;ko00360;ko00360;ko00360;ko00360;ko00360;ko00360;ko00360;ko00360;ko00360;ko00360	K02613;K02612;K02611;K02610;K02609;K00074;K01692;K15866;K00457;K00529;K00529;K00817;K01692;K05710;K00817;K00074;K01692;K01912;K01692;K01426;K01912;K00276;K05712;K01426;K01426;K01426;K03782;K00074;K00074;K01692;K05712;K00074;K15866;K00812;K00817
Organismal Systems	Immune system	NOD-like receptor signaling pathway	6	gene3828;gene4214;gene5129;gene5367;gene6494;gene7773	ko04621;ko04621;ko04621;ko04621;ko04621;ko04621	K03671;K03671;K04079;K03671;K03671;K03671
Genetic Information Processing	Replication and repair	Base excision repair	22	gene0526;gene1051;gene1505;gene1650;gene1846;gene2206;gene2336;gene2398;gene2477;gene2639;gene3991;gene4995;gene5415;gene5752;gene5895;gene6210;gene6347;gene6444;gene6804;gene7417;gene7483;gene7531	ko03410;ko03410;ko03410;ko03410;ko03410;ko03410;ko03410;ko03410;ko03410;ko03410;ko03410;ko03410;ko03410;ko03410;ko03410;ko03410;ko03410;ko03410;ko03410;ko03410;ko03410;ko03410	K01142;K05522;K01151;K02335;K03652;K10747;K03648;K03649;K03648;K21929;K01142;K21929;K10563;K01142;K13529;K05522;K10563;K01972;K01246;K03575;K02335;K10773
Metabolism	Nucleotide metabolism	Pyrimidine metabolism	40	gene0138;gene0164;gene0627;gene1072;gene1636;gene1675;gene1866;gene1883;gene2184;gene2185;gene2186;gene2188;gene2189;gene2190;gene2191;gene3047;gene3203;gene3544;gene3673;gene4433;gene4887;gene5726;gene5728;gene6058;gene6074;gene6169;gene6230;gene6307;gene6591;gene6713;gene6714;gene6875;gene7006;gene7015;gene7030;gene7031;gene7253;gene7503;gene7538;gene7648	ko00240;ko00240;ko00240;ko00240;ko00240;ko00240;ko00240;ko00240;ko00240;ko00240;ko00240;ko00240;ko00240;ko00240;ko00240;ko00240;ko00240;ko00240;ko00240;ko00240;ko00240;ko00240;ko00240;ko00240;ko00240;ko00240;ko00240;ko00240;ko00240;ko00240;ko00240;ko00240;ko00240;ko00240;ko00240;ko00240;ko00240;ko00240;ko00240;ko00240	K01494;K00762;K06016;K00940;K01119;K16329;K01937;K00945;K02825;K00609;K01465;K01956;K01955;K00254;K01591;K01489;K00943;K01081;K00560;K17828;K01955;K01464;K01431;K01520;K00857;K00525;K03465;K09903;K03365;K00525;K00526;K09019;K03783;K00876;K00758;K01489;K01485;K00943;K01081;K00761
Metabolism	Metabolism of other amino acids	Taurine and hypotaurine metabolism	8	gene0184;gene0709;gene1869;gene5722;gene5738;gene6510;gene6511;gene7472	ko00430;ko00430;ko00430;ko00430;ko00430;ko00430;ko00430;ko00430	K15372;K15371;K00259;K00681;K00681;K13788;K00925;K01580
Organismal Systems	Immune system	Th17 cell differentiation	1	gene5129	ko04659	K04079
Metabolism	Energy metabolism	Nitrogen metabolism	22	gene0498;gene0502;gene0709;gene0747;gene1132;gene1192;gene1193;gene1411;gene1417;gene1526;gene1592;gene1593;gene2053;gene2205;gene2850;gene2851;gene3749;gene3885;gene5097;gene5470;gene6137;gene7523	ko00910;ko00910;ko00910;ko00910;ko00910;ko00910;ko00910;ko00910;ko00910;ko00910;ko00910;ko00910;ko00910;ko00910;ko00910;ko00910;ko00910;ko00910;ko00910;ko00910;ko00910;ko00910	K02575;K00372;K15371;K02575;K00459;K00363;K00362;K01915;K01915;K01673;K00265;K00266;K01915;K01915;K01673;K01725;K01915;K01673;K00459;K00261;K01915;K01673
Metabolism	Energy metabolism	Oxidative phosphorylation	57	gene0608;gene1460;gene1461;gene1465;gene1466;gene1467;gene1468;gene1710;gene1713;gene1894;gene2954;gene4611;gene5394;gene5395;gene5396;gene5616;gene6557;gene6558;gene6560;gene6562;gene6563;gene6564;gene6845;gene6846;gene7052;gene7053;gene7054;gene7055;gene7264;gene7265;gene7266;gene7267;gene7268;gene7269;gene7270;gene7272;gene7273;gene7302;gene7303;gene7304;gene7305;gene7306;gene7307;gene7308;gen…	ko00190;ko00190;ko00190;ko00190;ko00190;ko00190;ko00190;ko00190;ko00190;ko00190;ko00190;ko00190;ko00190;ko00190;ko00190;ko00190;ko00190;ko00190;ko00190;ko00190;ko00190;ko00190;ko00190;ko00190;ko00190;ko00190;ko00190;ko00190;ko00190;ko00190;ko00190;ko00190;ko00190;ko00190;ko00190;ko00190;ko00190;ko00190;ko00190;ko00190;ko00190;ko00190;ko00190;ko00190;ko00190;ko00190;ko00190;ko00190;ko00190;ko00190…	K03885;K02275;K02274;K02276;K03889;K03890;K03891;K02257;K02259;K02274;K03885;K22468;K00240;K00239;K00241;K03891;K02114;K02112;K02111;K02109;K02110;K02108;K00239;K00240;K00241;K00242;K00239;K00240;K00343;K00342;K00341;K00340;K00339;K00338;K00337;K00331;K00330;K00343;K00342;K00341;K00340;K00339;K00338;K00337;K00336;K00335;K00334;K00333;K00332;K00331;K00330;K00333;K01507;K00937;K03885;K00426;K00425
Cellular Processes	Cellular community - prokaryotes	Biofilm formation - Vibrio cholerae	9	gene1595;gene2295;gene2693;gene3462;gene4431;gene5532;gene6312;gene7225;gene7532	ko05111;ko05111;ko05111;ko05111;ko05111;ko05111;ko05111;ko05111;ko05111	K01791;K02777;K01912;K01912;K02472;K01791;K02405;K10914;K10914
Metabolism	Xenobiotics biodegradation and metabolism	Drug metabolism - other enzymes	16	gene1072;gene2209;gene3047;gene3358;gene5247;gene5726;gene5728;gene6058;gene6074;gene7015;gene7030;gene7031;gene7123;gene7136;gene7137;gene7464	ko00983;ko00983;ko00983;ko00983;ko00983;ko00983;ko00983;ko00983;ko00983;ko00983;ko00983;ko00983;ko00983;ko00983;ko00983;ko00983	K00940;K00088;K01489;K00088;K03782;K01464;K01431;K01520;K00857;K00876;K00758;K01489;K01951;K00088;K00088;K00760
Metabolism	Global and overview maps	Biosynthesis of amino acids	145	gene0158;gene0165;gene0195;gene0196;gene0256;gene0304;gene0350;gene0364;gene0447;gene0452;gene0482;gene0567;gene0604;gene0621;gene0625;gene0921;gene0938;gene0967;gene1033;gene1050;gene1092;gene1094;gene1153;gene1411;gene1417;gene1469;gene1495;gene1500;gene1564;gene1565;gene1566;gene1568;gene1569;gene1571;gene1573;gene1574;gene1578;gene1580;gene1581;gene1592;gene1593;gene1632;gene1638;gene1671;gen…	ko01230;ko01230;ko01230;ko01230;ko01230;ko01230;ko01230;ko01230;ko01230;ko01230;ko01230;ko01230;ko01230;ko01230;ko01230;ko01230;ko01230;ko01230;ko01230;ko01230;ko01230;ko01230;ko01230;ko01230;ko01230;ko01230;ko01230;ko01230;ko01230;ko01230;ko01230;ko01230;ko01230;ko01230;ko01230;ko01230;ko01230;ko01230;ko01230;ko01230;ko01230;ko01230;ko01230;ko01230;ko01230;ko01230;ko01230;ko01230;ko01230;ko01230…	K14267;K01624;K00928;K00133;K01834;K01733;K00831;K01647;K01953;K00928;K01626;K00948;K01689;K01697;K01586;K01652;K01647;K00616;K00133;K01808;K00931;K00147;K01649;K01915;K01915;K00766;K21071;K01626;K00013;K00817;K01693;K02501;K24017;K02500;K01496;K01657;K01609;K01696;K01695;K00265;K00266;K04092;K00873;K14260;K00134;K00927;K01803;K00616;K00615;K00674;K01714;K00836;K00817;K01079;K04517;K00548;K01915;…
Genetic Information Processing	Replication and repair	Non-homologous end-joining	3	gene3307;gene6602;gene6603	ko03450;ko03450;ko03450	K01971;K10979;K01971
Metabolism	Amino acid metabolism	Tyrosine metabolism	16	gene0784;gene1329;gene1381;gene1565;gene1686;gene1766;gene1940;gene1948;gene2677;gene4078;gene4289;gene7126;gene7242;gene7294;gene7729;pA_gene0094	ko00350;ko00350;ko00350;ko00350;ko00350;ko00350;ko00350;ko00350;ko00350;ko00350;ko00350;ko00350;ko00350;ko00350;ko00350;ko00350	K00457;K00121;K01826;K00817;K16163;K00817;K00451;K00121;K00505;K00276;K13953;K00135;K00812;K01555;K00817;K00505
Metabolism	Metabolism of cofactors and vitamins	Pantothenate and CoA biosynthesis	34	gene0921;gene1300;gene1367;gene1659;gene1946;gene1947;gene2123;gene2195;gene2751;gene3085;gene3472;gene3628;gene3635;gene3640;gene3641;gene4248;gene4343;gene5117;gene5427;gene5726;gene5728;gene6143;gene6353;gene6405;gene6423;gene6424;gene6425;gene7012;gene7180;gene7182;gene7408;gene7434;gene7437;gene7474	ko00770;ko00770;ko00770;ko00770;ko00770;ko00770;ko00770;ko00770;ko00770;ko00770;ko00770;ko00770;ko00770;ko00770;ko00770;ko00770;ko00770;ko00770;ko00770;ko00770;ko00770;ko00770;ko00770;ko00770;ko00770;ko00770;ko00770;ko00770;ko00770;ko00770;ko00770;ko00770;ko00770;ko00770	K01652;K00128;K00606;K00859;K00128;K00128;K00826;K13038;K00077;K00826;K01652;K00997;K00997;K00128;K01579;K01598;K01652;K00128;K01579;K01464;K01431;K06133;K00954;K00826;K00053;K01653;K01652;K00128;K00997;K00867;K01687;K03525;K01918;K00128
Metabolism	Xenobiotics biodegradation and metabolism	Polycyclic aromatic hydrocarbon degradation	2	gene5608;gene5609	ko00624;ko00624	K00448;K00449
Metabolism	Glycan biosynthesis and metabolism	Glycosphingolipid biosynthesis - ganglio series	4	gene0758;gene0903;gene2966;gene7050	ko00604;ko00604;ko00604;ko00604	K12373;K12373;K12373;K12373
Metabolism	Xenobiotics biodegradation and metabolism	Toluene degradation	2	gene2905;gene5369	ko00623;ko00623	K01061;K00141
Metabolism	Metabolism of cofactors and vitamins	Nicotinate and nicotinamide metabolism	18	gene0793;gene0794;gene1100;gene1369;gene1454;gene1860;gene1875;gene2901;gene3544;gene4223;gene4805;gene6215;gene6755;gene7006;gene7126;gene7435;gene7436;gene7538	ko00760;ko00760;ko00760;ko00760;ko00760;ko00760;ko00760;ko00760;ko00760;ko00760;ko00760;ko00760;ko00760;ko00760;ko00760;ko00760;ko00760;ko00760	K08281;K00763;K00969;K01950;K03517;K00858;K06211;K01799;K01081;K00767;K01916;K03743;K03426;K03783;K00135;K00767;K00278;K01081
Metabolism	Glycan biosynthesis and metabolism	Arabinogalactan biosynthesis - Mycobacterium	1	gene6566	ko00572	K02851
Metabolism	Lipid metabolism	Glycerolipid metabolism	29	gene1300;gene1492;gene1596;gene1637;gene1853;gene1884;gene1946;gene1947;gene2012;gene2098;gene2283;gene2428;gene2659;gene2660;gene2661;gene2712;gene2723;gene3018;gene3183;gene3640;gene5117;gene5416;gene5465;gene5501;gene5531;gene5709;gene6984;gene7012;gene7474	ko00561;ko00561;ko00561;ko00561;ko00561;ko00561;ko00561;ko00561;ko00561;ko00561;ko00561;ko00561;ko00561;ko00561;ko00561;ko00561;ko00561;ko00561;ko00561;ko00561;ko00561;ko00561;ko00561;ko00561;ko00561;ko00561;ko00561;ko00561;ko00561	K00128;K00655;K19003;K07407;K06117;K00655;K00128;K00128;K00864;K00655;K00864;K00655;K05881;K05879;K05878;K01046;K07406;K07029;K07407;K00128;K00128;K00635;K07029;K07407;K19003;K00865;K13979;K00128;K00128
Metabolism	Lipid metabolism	Fatty acid degradation	45	gene0361;gene0485;gene0620;gene0918;gene1123;gene1205;gene1292;gene1300;gene1317;gene1329;gene1483;gene1510;gene1607;gene1613;gene1898;gene1946;gene1947;gene1948;gene1963;gene1965;gene2343;gene2691;gene2695;gene2698;gene2831;gene3210;gene3640;gene3643;gene4273;gene4289;gene4440;gene5117;gene5545;gene5546;gene5590;gene5630;gene5734;gene5860;gene5984;gene6015;gene6041;gene6536;gene7012;gene7327;gen…	ko00071;ko00071;ko00071;ko00071;ko00071;ko00071;ko00071;ko00071;ko00071;ko00071;ko00071;ko00071;ko00071;ko00071;ko00071;ko00071;ko00071;ko00071;ko00071;ko00071;ko00071;ko00071;ko00071;ko00071;ko00071;ko00071;ko00071;ko00071;ko00071;ko00071;ko00071;ko00071;ko00071;ko00071;ko00071;ko00071;ko00071;ko00071;ko00071;ko00071;ko00071;ko00071;ko00071;ko00071;ko00071	K01692;K01897;K00626;K00249;K01897;K00529;K00626;K00128;K00632;K00121;K01897;K00529;K00626;K01692;K00252;K00128;K00128;K00121;K01897;K00249;K01692;K01897;K01692;K00626;K00626;K00249;K00128;K01897;K00249;K13953;K01897;K00128;K01782;K00626;K01897;K01897;K00632;K00249;K00632;K00249;K01692;K00626;K00128;K01897;K00128
Metabolism	Carbohydrate metabolism	Glycolysis / Gluconeogenesis	55	gene0163;gene0165;gene0256;gene0298;gene0398;gene0604;gene1014;gene1162;gene1163;gene1186;gene1246;gene1300;gene1329;gene1430;gene1432;gene1433;gene1488;gene1495;gene1638;gene1698;gene1699;gene1700;gene1703;gene1946;gene1947;gene1948;gene2295;gene2431;gene2504;gene2832;gene3126;gene3410;gene3640;gene4289;gene4605;gene4614;gene4615;gene5117;gene5214;gene5248;gene5756;gene5811;gene5940;gene6512;gen…	ko00010;ko00010;ko00010;ko00010;ko00010;ko00010;ko00010;ko00010;ko00010;ko00010;ko00010;ko00010;ko00010;ko00010;ko00010;ko00010;ko00010;ko00010;ko00010;ko00010;ko00010;ko00010;ko00010;ko00010;ko00010;ko00010;ko00010;ko00010;ko00010;ko00010;ko00010;ko00010;ko00010;ko00010;ko00010;ko00010;ko00010;ko00010;ko00010;ko00010;ko00010;ko00010;ko00010;ko00010;ko00010;ko00010;ko00010;ko00010;ko00010;ko00010…	K01785;K01624;K01834;K25026;K24012;K01689;K01222;K00175;K00174;K01006;K00163;K00128;K00121;K00163;K00627;K00382;K25026;K21071;K00873;K00134;K00927;K01803;K01810;K00128;K00128;K00121;K02777;K21071;K25026;K01895;K01785;K01689;K00128;K13953;K00134;K01006;K01006;K00128;K00138;K00134;K25026;K01895;K00382;K00873;K00886;K02446;K01596;K13979;K00128;K00174;K00175;K00128;K01895;K01222;K00134
Human Diseases	Drug resistance: antineoplastic	Platinum drug resistance	1	gene0939	ko01524	K17686
Metabolism	Glycan biosynthesis and metabolism	Glycosphingolipid biosynthesis - globo and isoglobo series	8	gene0758;gene0903;gene1637;gene2723;gene2966;gene3183;gene5501;gene7050	ko00603;ko00603;ko00603;ko00603;ko00603;ko00603;ko00603;ko00603	K12373;K12373;K07407;K07406;K12373;K07407;K07407;K12373
Human Diseases	Infectious disease: parasitic	Amoebiasis	1	gene5015	ko05146	K01476
Human Diseases	Neurodegenerative disease	Prion disease	1	gene5019	ko05020	K04565
Metabolism	Biosynthesis of other secondary metabolites	Glucosinolate biosynthesis	4	gene2123;gene3085;gene6370;gene6405	ko00966;ko00966;ko00966;ko00966	K00826;K00826;K01703;K00826
Metabolism	Metabolism of terpenoids and polyketides	Biosynthesis of vancomycin group antibiotics	8	gene0722;gene4321;gene4322;gene4323;gene4680;gene4886;pA_gene0017;pA_gene0019	ko01055;ko01055;ko01055;ko01055;ko01055;ko01055;ko01055;ko01055	K01710;K16423;K16422;K16421;K16444;K01710;K16435;K01710
Organismal Systems	Aging	Longevity regulating pathway	4	gene3681;gene5800;gene6730;gene6886	ko04211;ko04211;ko04211;ko04211	K03781;K03781;K03781;K03781
Metabolism	Biosynthesis of other secondary metabolites	Stilbenoid, diarylheptanoid and gingerol biosynthesis	1	gene1257	ko00945	K00588
Environmental Information Processing	Signal transduction	MAPK signaling pathway - plant	6	gene0939;gene1072;gene3681;gene5800;gene6730;gene6886	ko04016;ko04016;ko04016;ko04016;ko04016;ko04016	K17686;K00940;K03781;K03781;K03781;K03781
Environmental Information Processing	Signal transduction	FoxO signaling pathway	5	gene3681;gene5800;gene6730;gene6886;gene6955	ko04068;ko04068;ko04068;ko04068;ko04068	K03781;K03781;K03781;K03781;K01596
Metabolism	Amino acid metabolism	Phenylalanine, tyrosine and tryptophan biosynthesis	24	gene0482;gene1469;gene1500;gene1565;gene1569;gene1574;gene1578;gene1580;gene1581;gene1632;gene1766;gene1882;gene2174;gene2175;gene2176;gene2177;gene2178;gene3143;gene4956;gene6724;gene7124;gene7242;gene7705;gene7729	ko00400;ko00400;ko00400;ko00400;ko00400;ko00400;ko00400;ko00400;ko00400;ko00400;ko00400;ko00400;ko00400;ko00400;ko00400;ko00400;ko00400;ko00400;ko00400;ko00400;ko00400;ko00400;ko00400;ko00400	K01626;K00766;K01626;K00817;K24017;K01657;K01609;K01696;K01695;K04092;K00817;K04517;K00014;K01736;K00891;K01735;K03786;K01735;K01626;K00800;K04093;K00812;K04518;K00817
Organismal Systems	Digestive system	Protein digestion and absorption	2	gene2330;gene6823	ko04974;ko04974	K01278;K01278
Human Diseases	Infectious disease: viral	Human T-cell leukemia virus 1 infection	1	gene3007	ko05166	K05770
Metabolism	Metabolism of terpenoids and polyketides	Biosynthesis of type II polyketide products	6	gene3032;gene3040;gene4836;gene6146;gene6147;gene6153	ko01057;ko01057;ko01057;ko01057;ko01057;ko01057	K05555;K14626;K05555;K15928;K15927;K15926
Human Diseases	Infectious disease: bacterial	Pathogenic Escherichia coli infection	4	gene1698;gene4605;gene5248;pA_gene0044	ko05130;ko05130;ko05130;ko05130	K00134;K00134;K00134;K00134
Genetic Information Processing	Folding, sorting and degradation	Proteasome	3	gene2025;gene2028;gene2029	ko03050;ko03050;ko03050	K13527;K03433;K03432
Metabolism	Glycan biosynthesis and metabolism	Other types of O-glycan biosynthesis	1	gene0543	ko00514	K00728
Metabolism	Metabolism of terpenoids and polyketides	Tetracycline biosynthesis	4	gene6149;gene6150;gene6151;gene6152	ko00253;ko00253;ko00253;ko00253	K12420;K05553;K05552;K05551
Metabolism	Carbohydrate metabolism	Pentose phosphate pathway	28	gene0003;gene0165;gene0567;gene0967;gene1050;gene1336;gene1495;gene1586;gene1703;gene1705;gene1707;gene1708;gene1709;gene1977;gene2202;gene2431;gene2474;gene2953;gene3201;gene3267;gene4619;gene4677;gene5160;gene5425;gene5824;gene6877;gene6941;gene7011	ko00030;ko00030;ko00030;ko00030;ko00030;ko00030;ko00030;ko00030;ko00030;ko00030;ko00030;ko00030;ko00030;ko00030;ko00030;ko00030;ko00030;ko00030;ko00030;ko00030;ko00030;ko00030;ko00030;ko00030;ko00030;ko00030;ko00030;ko00030	K00033;K01624;K00948;K00616;K01808;K01625;K21071;K00852;K01810;K01057;K00036;K00616;K00615;K00851;K01783;K21071;K07404;K00615;K00034;K01053;K01621;K01808;K00852;K00033;K01621;K02446;K00874;K01619
Metabolism	Metabolism of terpenoids and polyketides	Insect hormone biosynthesis	7	gene1300;gene1946;gene1947;gene3640;gene5117;gene7012;gene7474	ko00981;ko00981;ko00981;ko00981;ko00981;ko00981;ko00981	K00128;K00128;K00128;K00128;K00128;K00128;K00128
Metabolism	Xenobiotics biodegradation and metabolism	Dioxin degradation	1	gene5812	ko00621	K01821
Metabolism	Xenobiotics biodegradation and metabolism	Nitrotoluene degradation	2	gene1756;gene3414	ko00633;ko00633	K10680;K10680
Environmental Information Processing	Membrane transport	ABC transporters	151	gene0270;gene0379;gene0536;gene0537;gene0538;gene0713;gene0714;gene0729;gene0730;gene0731;gene0738;gene0739;gene0779;gene0780;gene0781;gene0782;gene0841;gene0842;gene0843;gene0844;gene0890;gene0891;gene0892;gene1046;gene1168;gene1169;gene1170;gene1208;gene1209;gene1296;gene1365;gene1366;gene1391;gene1392;gene1393;gene1642;gene1643;gene1644;gene1645;gene1646;gene1889;gene2006;gene2044;gene2045;gen…	ko02010;ko02010;ko02010;ko02010;ko02010;ko02010;ko02010;ko02010;ko02010;ko02010;ko02010;ko02010;ko02010;ko02010;ko02010;ko02010;ko02010;ko02010;ko02010;ko02010;ko02010;ko02010;ko02010;ko02010;ko02010;ko02010;ko02010;ko02010;ko02010;ko02010;ko02010;ko02010;ko02010;ko02010;ko02010;ko02010;ko02010;ko02010;ko02010;ko02010;ko02010;ko02010;ko02010;ko02010;ko02010;ko02010;ko02010;ko02010;ko02010;ko02010…	K10112;K01999;K02007;K02008;K02006;K09693;K09692;K10234;K10233;K10232;K09812;K09811;K05845;K05846;K05847;K05846;K11084;K11083;K11082;K11081;K10242;K10241;K10240;K03523;K09816;K09817;K09815;K18888;K18887;K16785;K18233;K18232;K15770;K15771;K15772;K01996;K01995;K01998;K01997;K01999;K01996;K10439;K02000;K02001;K02071;K02072;K02073;K15553;K15555;K15554;K17244;K17245;K17246;K10543;K10547;K10548;K10546;…
Organismal Systems	Digestive system	Fat digestion and absorption	7	gene0620;gene1292;gene1607;gene2698;gene2831;gene5546;gene6536	ko04975;ko04975;ko04975;ko04975;ko04975;ko04975;ko04975	K00626;K00626;K00626;K00626;K00626;K00626;K00626
Organismal Systems	Environmental adaptation	Plant-pathogen interaction	5	gene2012;gene2283;gene2346;gene5129;gene7221	ko04626;ko04626;ko04626;ko04626;ko04626	K00864;K00864;K02358;K04079;K02358
Organismal Systems	Digestive system	Mineral absorption	1	gene0939	ko04978	K17686
Human Diseases	Infectious disease: bacterial	Legionellosis	5	gene0307;gene1122;gene5395;gene6845;gene7054	ko05134;ko05134;ko05134;ko05134;ko05134	K04077;K03596;K00239;K00239;K00239
Genetic Information Processing	Transcription	RNA polymerase	4	gene2194;gene7191;gene7231;gene7232	ko03020;ko03020;ko03020;ko03020	K03060;K03040;K03046;K03043
Metabolism	Lipid metabolism	Glycerophospholipid metabolism	26	gene1492;gene1884;gene2011;gene2098;gene2099;gene2142;gene2253;gene2428;gene2490;gene2736;gene3018;gene3021;gene3471;gene3658;gene5465;gene5519;gene5615;gene5707;gene5708;gene6216;gene6291;gene6305;gene6363;gene6442;gene7133;gene7691	ko00564;ko00564;ko00564;ko00564;ko00564;ko00564;ko00564;ko00564;ko00564;ko00564;ko00564;ko00564;ko00564;ko00564;ko00564;ko00564;ko00564;ko00564;ko00564;ko00564;ko00564;ko00564;ko00564;ko00564;ko00564;ko00564	K00655;K00655;K00111;K00655;K01126;K00995;K01126;K00655;K01126;K01114;K07029;K00111;K00057;K01114;K07029;K00096;K01114;K01613;K17103;K00995;K01126;K00981;K00057;K01114;K00111;K01126
