# Supplementary material for: Isolation and Evaluation of Streptomyces melanogenes YBS22 with Potential Application for Biocontrol of Rice Blast Disease
Source: Microorganisms. 2023 Dec 15;11(12):2988. doi: 10.3390/microorganisms11122988 (PMC10745888; doi:10.3390/microorganisms11122988)
Supplement: Supplementary file 1 [file microorganisms-11-02988-s001.zip › Supplementary_Table4.xlsx]

## Sheet: Sheet1
Biosynthesis gene clusters(BGC)	Type	From	To	Most similar known cluster	MIBiG Similarity(%)
BGC-1	melanin	477921	487330	4-hydroxy-3-nitrosobenzamide	0.57
BGC-2	phenazine	511317	531805	diastaphenazine/izumiphenazine C	0.3
BGC-3	NI-siderophore	1034277	1043576	desferrioxamin B	1
BGC-4	PKS-like,amglyccycl	1095524	1135572	rubiginone A2/rubiginone J/rubiginone K/rubiginone L/rubiginone M/rubiginone N/ochromycinone/rubiginone B2	0.23
BGC-5	butyrolactone	1339767	1350753	coelimycin P1	0.16
BGC-6	lanthipeptide-class-iii	1494204	1516837	SRO15-2212	0.57
BGC-7	other	1850050	1887941	stlassin	0.25
BGC-8	ectoine	2018717	2027559	ectoine	1
BGC-9	RiPP-like	2794656	2802494	hexacosalactone A	0.04
BGC-10	NRPS-like,NRPS	2868403	2936948	GE81112	0.21
BGC-11	melanin	3044249	3054677	melanin	0.28
BGC-12	terpene	3068634	3088257	pristinol	1
BGC-13	lanthipeptide-class-iv	3112469	3134017	catenulisporolides	0.05
BGC-14	T3PKS	3137663	3179691	flaviolin/1,3,6,8-tetrahydroxynaphthalene	1
BGC-15	T1PKS,NRPS	3200048	3285478	antimycin	1
BGC-16	amglyccycl,T1PKS,prodigiosin	3527721	3610117	fuelimycin A/fuelimicin B/fuelimicin C	1
BGC-17	lanthipeptide-class-iv,terpene	3756524	3780885	2-methylisoborneol	1
BGC-18	thioamitides	3869948	3892343
BGC-19	ladderane	4041052	4083517	metatricycloene	0.35
BGC-20	terpene	4406824	4426820
BGC-21	NRPS-like,terpene	4544649	4587632	ebelactone	0.05
BGC-22	NRPS,NRPS-like	4770749	4833565	Q6402A	0.15
BGC-23	terpene	4869122	4887824
BGC-24	ectoine	4912954	4923325	anthelvencin A/anthelvencin B/anthelvencin C	0.27
BGC-25	lanthipeptide-class-i	4973056	4997449
BGC-26	NRPS,NRPS-like	5058884	5105744	antipain	1
BGC-27	terpene	5163993	5184609	legonindolizidine A6	0.12
BGC-28	lanthipeptide-class-ii	5264477	5287302
BGC-29	RiPP-like	5463932	5475025
BGC-30	lassopeptide,lanthipeptide-class-iv	5868942	5896503	lagmysin	0.8
BGC-31	terpene	6138881	6162971	hopene	0.84
BGC-32	T1PKS,hglE-KS	6190283	6241470	hexacosalactone A	0.15
BGC-33	redox-cofactor,T3PKS	6292401	6346863	accramycin A	0.16
BGC-34	other,PKS-like	6524328	6584195	A-503083 A/A-503083 B/A-503083 E/A-503083 F	0.07
BGC-35	RiPP-like	6670224	6692943
BGC-36	T2PKS,NI-siderophore	6873090	6945575	kinamycin	0.8
BGC-37	CDPS	7265090	7285833	BD-12	0.17
BGC-38	T3PKS	8519741	8560838	7-deoxypactamycin	0.15
BGC-39	terpene	8595682	8617913	TVA-YJ-2	0.21
