# Supplementary material for: Isolation and Evaluation of Streptomyces melanogenes YBS22 with Potential Application for Biocontrol of Rice Blast Disease
Source: Microorganisms. 2023 Dec 15;11(12):2988. doi: 10.3390/microorganisms11122988 (PMC10745888; doi:10.3390/microorganisms11122988)
Supplement: Supplementary file 1 [file microorganisms-11-02988-s001.zip › Supplementary_Table5.xlsx]

## Sheet: Sheet1
Effect of pH and Heat Stability on Crude Extract of Strain YBS22 against M. oryzae.
pH	Colony diameter (cm)	Inhibition ratio (%)	Processing temperature (℃)	Colony diameter (cm)	Inhibition ratio (%)
pH 3.0	2.21±0.11 b	50.56	20	1.20±0.05 b	73.15
pH 5.0	2.25±0.04 b	49.66	40	1.20±0.05 b	73.15
pH 7.0	1.16±0.05 c	74.05	60	1.57±0.08 b	64.88
pH 9.0	3.95±0.45 d	11.63	80	2.65±0.05 c	40.72
pH 11.0	3.96±0.11 d	11.41	100	2.85±0.15 c	36.24
Control	4.47±0.43 a	-	121	3.80±1.15 d	14.99
			Control	4.47±0.43 a	-
Note：Data were presented as mean ± SD, with different letters indicated significant difference at p≤0.05
