# Supplementary material for: Isolation and Evaluation of Streptomyces melanogenes YBS22 with Potential Application for Biocontrol of Rice Blast Disease
Source: Microorganisms. 2023 Dec 15;11(12):2988. doi: 10.3390/microorganisms11122988 (PMC10745888; doi:10.3390/microorganisms11122988)
Supplement: Supplementary file 1 [file microorganisms-11-02988-s001.zip › Supplementary_Table6.xlsx]

## Sheet: Sheet1
Weight and antifungal activity of components T1~T8
No. of component	Net weight(g)	Antibacterial activity
T1	0.534	-
T2	7.353	+
T3	3.525	+
T4	7.377	-
T5	11.926	+
T6	8.214	-
T7	15.581	-
T8	0.289	-
