# Supplementary material for: Isolation and Evaluation of Streptomyces melanogenes YBS22 with Potential Application for Biocontrol of Rice Blast Disease
Source: Microorganisms. 2023 Dec 15;11(12):2988. doi: 10.3390/microorganisms11122988 (PMC10745888; doi:10.3390/microorganisms11122988)
Supplement: Supplementary file 1 [file microorganisms-11-02988-s001.zip › Supplementary_Table7.xlsx]

## Sheet: Sheet1
1H and 13C NMR Assignments for Compound 1.
Position	δH	Reference δH	δC	Reference δC
1	8.31 (1H, d)	8.48 (1H, d,)	126	124.5
2			128.4	126.9
3			153.2	150
4			115.8	113
5	7.65 (1H, d)	7.30 (1H, d)	123.7	120.3
6	6.88 (1H, t)	6.87 (1H, t)	118.9	118.8
7
8	8.31 (1H, s)	8.47 (1H, s)	162.1	159
9
10			171.8	170
11
12
13	4.74 (1H, d)	4.76 (1H, br d)	59.5	57.2
14	4.40 (1H, m)	4.48 (1H, dq)	68.5	67.8
15
16	1.25 (3H, d)	1.29 (3H, d)	20.5	20.2
17			172.5	171
18
19
20	3.78 (3H, s)	3.81 (3H, s)	53	52.9
